# Supplementary material for: Players’ and coaches’ knowledge and awareness of the BokSmart Safe Six injury prevention programme: an ecological cross-sectional questionnaire study
Source: PubMed Central journal article supplement — BMJ Open. 2017 Nov 3;7(11):e018575. doi: 10.1136/bmjopen-2017-018575 (PMC5695297; doi:10.1136/bmjopen-2017-018575), 2017-11-03
Supplement: bmjopen-2017-018575.draft_revisions.pdf [file bmjopen-2017-018575.draft_revisions.pdf]

# BMJ Open

BMJ Open is committed to open peer review. As part of this commitment we make the peer review history of every article we publish publicly available.

When an article is published we post the peer reviewers' comments and the authors' responses online. We also post the versions of the paper that were used during peer review. These are the versions that the peer review comments apply to.

The versions of the paper that follow are the versions that were submitted during the peer review process. They are not the versions of record or the final published versions. They should not be cited or distributed as the published version of this manuscript.

BMJ Open is an open access journal and the full, final, typeset and author-corrected version of record of the manuscript is available on our site with no access controls, subscription charges or pay-per-view fees (<http://bmjopen.bmj.com>).

If you have any questions on BMJ Open's open peer review process please email [editorial.bmjopen@bmj.com](mailto:editorial.bmjopen@bmj.com)

# BMJ Open

## Players' and Coaches' knowledge and awareness of the BokSmart Safe Six Injury Prevention Programme

|                                 |                                                                                                                                                                                                                                                                                                                                                                                                                                                         |
|---------------------------------|---------------------------------------------------------------------------------------------------------------------------------------------------------------------------------------------------------------------------------------------------------------------------------------------------------------------------------------------------------------------------------------------------------------------------------------------------------|
| Journal:                        | <i>BMJ Open</i>                                                                                                                                                                                                                                                                                                                                                                                                                                         |
| Manuscript ID                   | bmjopen-2017-018575                                                                                                                                                                                                                                                                                                                                                                                                                                     |
| Article Type:                   | Research                                                                                                                                                                                                                                                                                                                                                                                                                                                |
| Date Submitted by the Author:   | 07-Jul-2017                                                                                                                                                                                                                                                                                                                                                                                                                                             |
| Complete List of Authors:       | Sewry, Nicola; University of Cape Town Research Unit for Exercise Science and Sports Medicine<br>Verhagen, Evert; VU University Medical Center, Public and Occupational Health<br>Lambert, Mike; Sports Science Institute of South Africa, MRC/UCT Research Unit for Exercise Science and Sports Medicine<br>Van Mechelen, Willem; VU University Medical Center, Public and Occupational Health<br>Brown, James; University of Cape Town, Human Biology |
| <b>Primary Subject Heading</b>: | Sports and exercise medicine                                                                                                                                                                                                                                                                                                                                                                                                                            |
| Secondary Subject Heading:      | Epidemiology                                                                                                                                                                                                                                                                                                                                                                                                                                            |
| Keywords:                       | injury prevention, awareness, cross-sectional, social media                                                                                                                                                                                                                                                                                                                                                                                             |
|                                 |                                                                                                                                                                                                                                                                                                                                                                                                                                                         |

SCHOLARONE™  
Manuscripts

1  
2  
3 Players' and Coaches' knowledge and awareness of the BokSmart *Safe Six* Injury Prevention  
4 Programme  
5  
6

7 Nicola Sewry<sup>1</sup>

8  
9 Evert Verhagen<sup>1,2,3</sup>

10  
11 Mike Lambert<sup>1,2</sup>

12  
13 Willem van Mechelen<sup>1,2,4,5</sup>

14  
15 James Brown<sup>1,2</sup>  
16  
17

18 <sup>1</sup>Division of Exercise Science and Sports Medicine, Department of Human Biology,  
19 University of Cape Town, Cape Town, South Africa  
20

21 <sup>2</sup>Amsterdam Collaboration on Health and Safety in Sports, Department of Public and  
22 Occupational Health and Amsterdam Public Health Research Institute, VU University  
23 Medical Center, Amsterdam, The Netherlands  
24

25 <sup>3</sup>Australian Centre for Research into Injury in Sport and its Prevention (ACRISP), Federation  
26 University Australia, Ballarat, Australia  
27

28 <sup>4</sup>School of Human Movement and Nutrition Sciences, Faculty of Health and Behavioural  
29 Sciences, University of Queensland, Brisbane, Australia  
30

31 <sup>5</sup>School of Public Health, Physiotherapy and Population Sciences, University College Dublin,  
32 Dublin, Ireland  
33  
34  
35  
36  
37  
38  
39

40 Corresponding Author's Details:

41 Nicola Sewry

42 [nicolasewry@hotmail.com](mailto:nicolasewry@hotmail.com)

43  
44  
45 Telephone Number: +27 84 618 1753

46  
47 Fax Number: +27 21 650 1796  
48  
49  
50  
51  
52  
53  
54  
55  
56  
57  
58  
59  
60

1  
2  
3 Funding Statement

4 NS's PhD is funded by the Vrije Universiteit Amsterdam / National Research Foundation South Africa through the Desmond  
5 Tutu Doctoral Scholarship, administered through the South Africa Vrije Universiteit Strategic Alliance (SAVUSA). NS also  
6 receives funding from the University of Cape Town, Zuid-Afrika Huis study foundation and the Oppenheimer Memorial  
7 Trust.  
8  
9

10 Data Sharing Statement

11 All data is published, and therefore there is no additional data available. If raw data is requested, requests will be reviewed  
12 on a discretionary basis by BokSmart (who can be contacted via email through the corresponding author -  
13 swrnic009@myuct.ac.za).  
14

15 Competing Interests Statement

16 None.  
17  
18  
19  
20  
21  
22  
23  
24  
25  
26  
27  
28  
29  
30  
31  
32  
33  
34  
35  
36  
37  
38  
39  
40  
41  
42  
43  
44  
45  
46  
47  
48  
49  
50  
51  
52  
53  
54  
55  
56  
57  
58  
59  
60

## Abstract

### *Objectives*

Rugby has a high injury incidence and therefore BokSmart introduced the *Safe Six* injury prevention programme in 2014 in an attempt to decrease this incidence. In 2015, BokSmart used a “targeted marketing approach” to increase the awareness and knowledge of the *Safe Six*. Therefore, the aim of this study was to determine the change in the knowledge of coaches and players of the *Safe Six* programme, compared to the launch year, following a “targeted marketing approach”.

### *Design*

Ecological cross sectional questionnaire study

### *Setting*

The 2014 – 2016 South African rugby union youth week tournaments.

### *Participants*

Questionnaires were completed by 4,502 players and coaches who attended any of the four youth week tournaments during 2014 – 2016.

### *Outcome Measures*

Logistic regression (adjusted odds ratio, 95% CI) was performed in comparison to year prior to targeted marketing, separately for coaches and players, for changes in awareness and knowledge.

### *Results*

The awareness of the *Safe Six* increased significantly for players in 2015 (1.74 times [1.49; 2.04]) and in 2016 (1.54 times [1.29; 1.84]). Similarly for coaches, there was a 3.55 times [1.23; 9.99] increase in 2015 and a 10.11 times [2.43; 42.08] increase in 2016 compared to 2014. Furthermore, a player was significantly more likely to be aware of the *Safe Six* if his coach was aware of the programme ( $p < 0.05$ ).

### *Conclusions*

The knowledge and awareness of the BokSmart *Safe Six* of both players and coaches increased in 2015 and 2016 (compared to 2014) since the launch of the programme. Coaches, the Unions/SARU and social media were the largest contributors to knowledge in coaches and players. Whilst the “targeted marketing approach” was associated with an increase in awareness, future studies should determine if this translates into behavioural change.

## Strengths and Limitations of the Study

- This study is novel as it looks at what sources South African coaches and players received their BokSmart injury prevention information from.
- The findings could help BokSmart and other nationwide injury prevention programmes target audiences more effectively.
- The number of repeat participants completing the survey in consecutive years is unknown and assumed to be minimal.
- The results are self-reported and not observed behaviour and should be interpreted with caution.

For peer review only

## Introduction

Rugby union (hence referred to as “rugby”) is a sport played globally and has a high risk of injury when compared to other sports.[1-3] Owing to this high risk, multiple nationwide injury prevention programmes have been designed and implemented in various countries, such as RugbySmart in New Zealand and Smart Rugby in Australia.[4, 5] In South Africa, the South African Rugby Union (SARU) developed and implemented BokSmart in an attempt to decrease the injury burden through research-based initiatives.[6]

The BokSmart injury prevention programme focuses its initiatives through mandatory biennial courses, which are DVD-facilitated workshops for all coaches and referees in South Africa.[7] RugbySmart also targets the coaches and referees, and has been associated with decreases in spinal cord injuries and overall injury rates in specifically targeted areas.[8, 9] There was also an increase in “safe” behaviours in the contact situations following the introduction of RugbySmart.[8] Similarly, the BokSmart programme has also been associated with improvements in injury prevention behaviours in players, which is hypothesised to lead to a decrease in injuries.[10, 11] Furthermore, BokSmart has been associated with a decrease in catastrophic injuries in junior rugby players in South Africa.[12] These studies all indicate that the coach-targeted approach for injury prevention in rugby is successful.[11] These studies were all quantitative and descriptive studies, which provide information regarding changes over time in injury rates, knowledge and awareness of the programme and allow for inferences to be made.

Following the success of the BokSmart programme, BokSmart further developed and implemented the *Safe Six* exercise-based injury prevention programme in the beginning of 2014. The BokSmart *Safe Six* programme is coach-targeted, and aimed at being implemented as a warm-up before training or competition.[13] Following the introduction in 2014, no explicit marketing was performed (deemed the “pre” marketing period), subsequently in 2015, prior to the annual SARU youth week tournaments, a “targeted marketing approach” was taken using emails to the respective youth week teams’ coaches, provincial unions and SARU. As with all BokSmart programmes, whilst the *Safe Six* is coach-targeted, it is hypothesised that there will be knowledge transfer from the coaches to the players.

Thus, the aim of this study is to determine the change in the knowledge of coaches and players of the *Safe Six* programme, compared to the launch year, following a targeted marketing approach. And secondly, whether a coach-targeted intervention approach is associated with player knowledge and awareness of the *Safe Six* programme. Finally, this study explores the reasons why coaches and players use the *Safe Six* programme.

## Methods

### *Participants*

The players and coaches of all South African teams attending the SARU youth week tournaments in 2014, 2015 and 2016 were required to complete a questionnaire (not the same players every year, but all players at all tournaments every year). The youth week tournaments are an annual opportunity to showcase the talent of the best youth rugby players in South Africa’s various provincial unions. The youth week tournaments included in this

1  
2  
3 study were the Under 13 Craven Week, U16 Grant Khomo Week, Under 18 Academy Week,  
4 Under 18 Craven Week, Under 18 Learners with Special Education Needs (LSEN) Week and  
5 Under 17 Sevens Tournament. The players and coaches were asked to complete the  
6 questionnaire independently at any point during the tournament and to return it to the  
7 tournament medical officer. Each coach and player gave written consent prior to the  
8 tournament and the study received ethical clearance from the Human Research Ethics  
9 Committee of the University of Cape Town.  
10  
11

### 12 *BokSmart Safe Six Targeted Marketing*

13 In 2014 BokSmart launched the *Safe Six* programme, but did not perform any explicit  
14 marketing; this is deemed the “pre” marketing period for the current study. In 2015, before  
15 the youth week tournaments, a targeted marketing approach was taken, using emails  
16 (including the full *Safe Six* programme) to the respective youth week coaches; i.e. provincial  
17 unions and SARU both provided informative material to all coaches attending the youth  
18 weeks. The social media accounts of SA Rugby Youth Weeks (10 172 Facebook and 1 959  
19 Twitter followers, 2017) and BokSmart (4 060 Facebook and 2 996 Twitter followers, 2017)  
20 were used as platforms to market the *Safe Six* programme, and so the 2015 year is the  
21 “during” marketing period. The social media marketing included copies of the Safe Six  
22 posters (details regarding the exercises, repetitions and images) and links to YouTube  
23 instructional videos. In 2016, similarly to 2014, no specific marketing was made towards  
24 those attending the youth weeks and can be considered the “post” marketing period.  
25  
26  
27  
28  
29

### 30 *Questionnaire*

31 The questionnaire was designed by BokSmart to determine the players’ and coaches’  
32 knowledge, behaviour and awareness of the *Safe Six* injury prevention programme. The  
33 BokSmart *Safe Six* is targeted at the coach and therefore the questionnaire (supplementary  
34 material I) assesses knowledge and it’s transfer to behaviour of the coaches, as well as the  
35 barriers and facilitators in this process. The questionnaire also assesses the fidelity of  
36 knowledge by requiring the participants to correctly name the exercises. Following this, the  
37 BokSmart coach-targeted approach would assume that this knowledge would transfer from  
38 the coach to the player, and therefore the questionnaire also assesses the knowledge and  
39 behaviour of the players.  
40  
41  
42

### 43 *Statistics*

44 Descriptive statistics were performed on the tournaments, the participants, their roles and  
45 their responses. Logistic regression was performed to determine an adjusted odds ratio (aOR,  
46 with 95% CIs) (adjusting for team role and year) on various binary outcomes (yes or no). All  
47 analyses were performed using IBM SPSS Statistics 23 (2015). Statistical significance was  
48 accepted when the  $p < 0.05$ .  
49  
50

### 51 **Results**

52 Over the three years of data collection a total of 4,502 participants completed the  
53 questionnaire from six different tournaments in three consecutive years. Of the participants,  
54 92% were players, and the rest were coaches or of unknown role (Table 1).  
55  
56  
57  
58  
59  
60



Table 1: The team roles of participants who completed the questionnaire (n=4502).

| <b>Team Role</b> | <b>2014</b> | <b>2015</b> | <b>2016</b> | <b>Total</b> |
|------------------|-------------|-------------|-------------|--------------|
| Coach            | 27          | 52          | 33          | 112          |
| Player           | 1351        | 1715        | 1070        | 4136         |
| Unknown          | 136         | 80          | 38          | 254          |
| <b>Total</b>     | <b>1514</b> | <b>1847</b> | <b>1141</b> | <b>4502</b>  |

For players, the awareness of the *Safe Six* increased significantly in 2015 (1.74 times [1.49; 2.04]) and in 2016 (1.54 times [1.29; 1.84]) compared to 2014. Similarly, for coaches, there was a 3.55 times [1.23; 9.99] increase in 2015 and a 10.11 times [2.43; 42.08] increase in 2016 compared to 2014. However, the difference between 2015 and 2016 for both coaches and players was not significant.

Table 2: Responses to the question "Have you ever heard of the BokSmart Safe Six?" (n=4257, blank=207).

| <b>Team Role</b> | <b>2014</b> |            | <b>2015</b> |            | <b>2016</b> |            | <b>Total</b> |             |
|------------------|-------------|------------|-------------|------------|-------------|------------|--------------|-------------|
|                  | <b>No</b>   | <b>Yes</b> | <b>No</b>   | <b>Yes</b> | <b>No</b>   | <b>Yes</b> | <b>No</b>    | <b>Yes</b>  |
| Coach            | 13          | 12         | 11          | 36         | 3           | 28         | 27           | 76          |
| Player           | 946         | 341        | 1002        | 627        | 663         | 368        | 2611         | 1336        |
| <b>Total</b>     | <b>959</b>  | <b>353</b> | <b>1013</b> | <b>663</b> | <b>666</b>  | <b>396</b> | <b>2638</b>  | <b>1412</b> |
| <b>%</b>         | <b>73</b>   | <b>27</b>  | <b>60</b>   | <b>40</b>  | <b>63</b>   | <b>37</b>  | <b>65</b>    | <b>35</b>   |

Furthermore, in 2015 players were 4.94 [2.78; 8.80] times more likely to be aware of the *Safe Six* if their respective coaches were aware of the programme (Table 3).

Table 3: The players' responses related to what their respective coaches answered to the question "Have you ever heard of the BokSmart Safe Six?" during 2015 (number of coaches = 47).

| <b>Coaches' Response</b> | <b>Players' Response % (n)</b> |                 |                  |
|--------------------------|--------------------------------|-----------------|------------------|
|                          | <b>No</b>                      | <b>Yes</b>      | <b>Total</b>     |
| <b>No</b>                | 20 (123)                       | 2 (11)          | 22 (134)         |
| <b>Yes</b>               | 46 (278)                       | 32 (190)        | 78 (468)         |
| <b>Total</b>             | <b>66 (401)</b>                | <b>34 (201)</b> | <b>100 (602)</b> |

SARU (2014), provincial unions (2015) and social media/news (2016) were the largest sources of information of the *Safe Six* over the years for coaches (Figure 1). For players, the largest source of information regarding the *Safe Six* was through coaches, social media/news was the second largest and the provincial unions were also large contributors to the dissemination of knowledge.

The participants were asked to name the exercises, and these were then assessed to be correct and tallied up. They were asked to correctly complete as many of the six exercises as they could. Table 4 therefore illustrates the number of the total participants that could correctly

name the exercises. The participants were asked to name as many as possible and therefore percentages were not possible to calculate due to incorrect answers and some answering more than others.

Table 4: The number of correct answers when the participants were asked to list as many of the BokSmart Safe Six exercises as they could remember in 2015 only.

| Exercise              | Coach | Players | Total |
|-----------------------|-------|---------|-------|
| Six Meter Shuttle Run | 22    | 321     | 343   |
| Six Point Lunge       | 19    | 294     | 313   |
| Buttsmart Six         | 14    | 257     | 271   |
| Six-on-a-Side Push Up | 16    | 247     | 263   |
| Six Bok Lunge         | 18    | 223     | 241   |
| Six Dynamic Reaches   | 17    | 139     | 156   |

In 2015 the reported usage of the *Safe Six* exercises was significantly higher for players than that of 2014 (aOR = 1.75 [1.36; 2.26]), but in 2016 there was no significant change compared to 2014 (Table 6). For coaches, the usage was significantly higher in 2015, with a 4.14 times [1.15; 14.92] increase, however in 2016 there was no significant change when compared to 2014.

Table 5: Participants' responses to the question "In the last 6-8 weeks have you ever used the BokSmart Safe Six exercises?" (n=1,599, blank=48).

| Team Role      | 2014 (%)  |           | 2015 (%)  |           | 2016 (%)  |           | Total (%) |           |
|----------------|-----------|-----------|-----------|-----------|-----------|-----------|-----------|-----------|
|                | No        | Yes       | No        | Yes       | No        | Yes       | No        | Yes       |
| Coach          | 2         | 2         | 1         | 4         | 1         | 5         | 1         | 4         |
| Player         | 41        | 55        | 31        | 64        | 50        | 44        | 39        | 56        |
| <b>Total %</b> | <b>43</b> | <b>57</b> | <b>32</b> | <b>68</b> | <b>51</b> | <b>49</b> | <b>40</b> | <b>60</b> |

The largest number of participants reported using the *Safe Six* because it was "part of their team warm-up" (over all the years) (Figure 2).

## Discussion

Overall there were significant changes in the awareness and knowledge of the coaches' and players' of the BokSmart *Safe Six* injury prevention programme. Furthermore, there was a significant relationship between the knowledge and awareness of coaches and their respective players. This finding supports BokSmart's coach-targeted approach.

Awareness of the *Safe Six* increased in 2015 and 2016 compared to 2014, in coaches and players following the targeted marketing period. The coaches' knowledge and awareness of the *Safe Six* was significantly higher than that of the players', which was to be expected because BokSmart as a whole and specifically the *Safe Six* is a coach-targeted programme.[7] Furthermore, when comparing the coaches' knowledge and awareness to their respective players' knowledge and awareness, there was a significant relationship in the marketing year, indicating that the coach-driven approach was effective in knowledge transfer to the players. This relationship, and the consequences of this relationship has been illustrated in other studies in rugby. In New Zealand, RugbySmart is a coach-targeted programme, which has been associated with an increase in injury preventing behaviours in players.[8] In South Africa, the BokSmart programme as a whole has also been associated with positive changes in injury prevention behaviours in the players.[10] Other more specific exercise-based injury prevention programmes have also been coach-targeted, with their results indicating a preventive effect (in certain areas, not overall injuries) for the players.[14, 15] This indicates that with their results a coach-targeted programme is effective in educating the coach, as well as getting coaches to implement the injury prevention measures.[14, 15] These programmes indicate that coach-targeted programmes have the desired effect on the players they are trying to reach. It must be noted that the percentage of repeat participants completing the questionnaire in subsequent years is assumed to be minimal (as with all studies using the SARU youth week rugby tournaments as the cohort).

However, when further analysing the fidelity of knowledge of the coaches and players of the *Safe Six*, their ability to name the exercises was poor, compared to the total number of participants. Therefore, if the *Safe Six* is a programme important to BokSmart, and is potentially effective in preventing injuries,[13] it is suggested that BokSmart continues to perform the marketing measures on an annual basis (more than just incorporated into the current BokSmart biennial courses)[7] to reach the target audiences and to increase the use of the programme.

As mentioned above, the *Safe Six* programme was designed as an injury prevention programme, but exploring the arguments as to why players and coaches implement the exercises is important to understand. The explanations for use of the *Safe Six* programme were predominantly for the warm-up in both the players and coaches, however, the second most popular explanation for players was injury prevention and for coaches was to improve performance. The programme was designed to be incorporated into the warm-up as an injury prevention programme, and therefore is being used as intended. However, there could also be a "misconception" between coaches that the *Safe Six* is a performance enhancement programme, instead of an injury prevention programme. It must be noted that a significant

1  
2  
3 number of both the coaches and players perceived the *Safe Six* to be easy to use (which was  
4 BokSmart's goal when designing the programme), which therefore did not hamper their  
5 experiences regarding the programme.  
6

7  
8 The source of information varied between coaches and players. The coaches reported  
9 receiving most of their information from social media/news. Coaches received  
10 communication from their respective provincial unions who are governed by SARU, and  
11 therefore this relationship was expected. Social media/news were especially targeted in the  
12 marketing period using mostly the Twitter and Facebook BokSmart accounts (2996 and 4065  
13 followers respectively) (April 2017). For the players, most heard of the *Safe Six* from their  
14 coaches. The next popular source of hearing about the programme was from social  
15 media/news. This raises an interesting method of communicating for injury prevention  
16 awareness. The method was free and proved effective in reaching both the coaches and  
17 players. Social media and phone applications have become a new form of implementation for  
18 injury prevention programmes.[16, 17] In a review of phone-based injury prevention  
19 applications there were eighteen applications which claimed to have sports or health benefits.  
20 This indicates a shift towards the technology-based form of injury prevention methods.[16]  
21 Whilst these applications may not all have been based on scientific principles, they still  
22 attract attention.  
23  
24  
25  
26

27  
28 Another study showed that an application focused on reducing ankle sprains had a low  
29 compliance once downloaded.[17] This suggests that technology-based reach can be high, but  
30 the uptake may be low. Therefore targeted efforts are required to ensure that the programme  
31 is used appropriately.[17] This principle could also be applied to the *Safe Six* where the reach  
32 and usage increased during the marketing period (possibly because of the social media  
33 exposure), and then decreased post-marketing. This is important knowledge for BokSmart  
34 and how they continue to disseminate knowledge regarding the *Safe Six* and future initiatives.  
35  
36

### 37 Limitations

38  
39 This was a cross-sectional study and self-reported knowledge, usage, exposure and not  
40 observed behaviour, and therefore the results must be interpreted in this context.  
41  
42  
43

### 44 Conclusion

45  
46  
47 The knowledge and awareness of the BokSmart *Safe Six* of both players and coaches  
48 increased in 2015 and 2016 (compared to 2014) since the launch of the programme, however,  
49 did slightly decrease during the post-marketing period. The coaches reported receiving their  
50 information regarding the *Safe Six* from the Unions/SARU and social media/news. The  
51 information for the players, came from the coaches and social media/news. Finally the  
52 reasons for using the programme were predominantly for the warm-up, injury prevention and  
53 for performance improvements. The information gathered in this study will help with  
54 designing targeted marketing for future programmes and for further promotion of the  
55  
56  
57  
58  
59  
60

1  
2  
3  
4  
5  
6  
7  
8  
9  
10  
11  
12  
13  
14  
15  
16  
17  
18  
19  
20  
21  
22  
23  
24  
25  
26  
27  
28  
29  
30  
31  
32  
33  
34  
35  
36  
37  
38  
39  
40  
41  
42  
43  
44  
45  
46  
47  
48  
49  
50  
51  
52  
53  
54  
55  
56  
57  
58  
59  
60

BokSmart *Safe Six*. It also provides insight into the perceptions of the coaches and players regarding the *Safe Six* and therefore allows for BokSmart to make adjustments accordingly.

For peer review only

## References

1. Brooks J, Kemp S. Recent trends in rugby union injuries. *Clin Sports Med* 2008;51 -73.
2. Hootman JM, Dick R, Agel J. Epidemiology of Collegiate Injuries for 15 Sports: Summary and Recommendations for Injury Prevention Initiatives. *J Athl Train* 2007;42(2):311-19
3. Williams S, Trewartha G, Kemp S, Stokes K. A meta-analysis of injuries in senior men's professional Rugby Union. *Sports Med* 2013;43(10):1043-55.
4. Union AR. Key points for the tackler and ball-carrier, Australian Rugby Union SmartRugby: Confidence in contact. A guide to the SmartRugby Program., 2008:18-19.
5. Union NZR. Technique: the key factors in the tackle and taking the ball into contact. RugbySmart 2007: A guide to injury prevention for peak performance., 2007:12-14.
6. SA Rugby. BokSmart: safe and effective techniques in rugby - practical guidelines., 2009.
7. Viljoen W, Patricios J. BokSmart – implementing a National Rugby Safety Programme. *Br. J. Sports Med* 2012;46(10):692-93.
8. Gianotti SM, Quarrie KL, Hume PA. Evaluation of RugbySmart: A rugby union community injury prevention programme. *J. Sci. Med. Sport* 2009;12(3):371-75.
9. Quarrie KL, Gianotti SM, Hopkins WG, Hume PA. Effect of nationwide injury prevention programme on serious spinal injuries in New Zealand rugby union: ecological study. *BMJ* 2007;334(7604):1150.
10. Brown JC, Gardner-Lubbe S, Lambert MI, et al. The BokSmart intervention programme is associated with improvements in injury prevention behaviours of rugby union players: an ecological cross-sectional study. *Inj Prev* 2015;21(3):173-78.
11. Brown JC, Gardner-Lubbe S, Lambert MI, et al. Coach-directed education is associated with injury-prevention behaviour in players: an ecological cross-sectional study. *Br. J. Sports Med* 2016:bjsports-2016.
12. Brown JC, Verhagen E, Knol D, et al. The effectiveness of the nationwide BokSmart rugby injury prevention program on catastrophic injury rates. *Scand. J. Med. Sci. Sports* 2016;26(2):221-25.
13. Sewry N, Verhagen E, Lambert M, et al. Evaluation of the Effectiveness and Implementation of the BokSmart Safe Six Injury Prevention Programme: a study protocol. *Inj Prev* 2016:injuryprev-2016.
14. Finch CF, Twomey DM, Fortington LV, et al. Preventing Australian football injuries with a targeted neuromuscular control exercise programme: comparative injury rates from a training intervention delivered in a clustered randomised controlled trial. *Inj Prev* 2015:injuryprev-2015.
15. Hislop M, Stokes K, Williams S, et al. The efficacy of a movement control exercise programme to prevent injuries in youth rugby: a cluster-randomised controlled trial. *Br J Sports Med* 2017;51(4):330-31.
16. van Mechelen DM, van Mechelen W, Verhagen EALM. Sports injury prevention in your pocket?! Prevention apps assessed against the available scientific evidence: a review. *Br J Sports Med* 2014;48(11):878-82].
17. Vriend I, Coehoorn I, Verhagen E. Implementation of an App-based neuromuscular training programme to prevent ankle sprains: a process evaluation using the RE-AIM Framework. *Br J Sports Med* 2015;49(7):484-88.

Contributors:

NS was granted access to the data and was involved in conceptualising the manuscript; she also conducted statistical analyses and wrote the initial drafts of the manuscript. JB and EV were also involved in the statistical analyses. All authors (EV, ML, WvM and JB) were involved in conceptualising and editing drafts of the paper, in the order that they appear on the author list.

*Figure 1: Coaches' and players' responses to the question "How did you come to hear about the BokSmart Safe Six?" (participants could choose multiple options).*

*Figure 2: The coaches' and players' who claimed to use the exercises, these are their responses to the question "Why did you use the BokSmart Safe Six exercises?" (participants could tick multiple options).*



1  
2  
3  
4  
5  
6  
7  
8  
9  
10  
11  
12  
13  
14  
15  
16  
17  
18  
19  
20  
21  
22  
23  
24  
25  
26  
27  
28  
29  
30  
31  
32  
33  
34  
35  
36  
37  
38  
39  
40  
41  
42  
43  
44  
45  
46  
47  
48  
49  
50  
51  
52  
53  
54  
55  
56  
57  
58  
59  
60

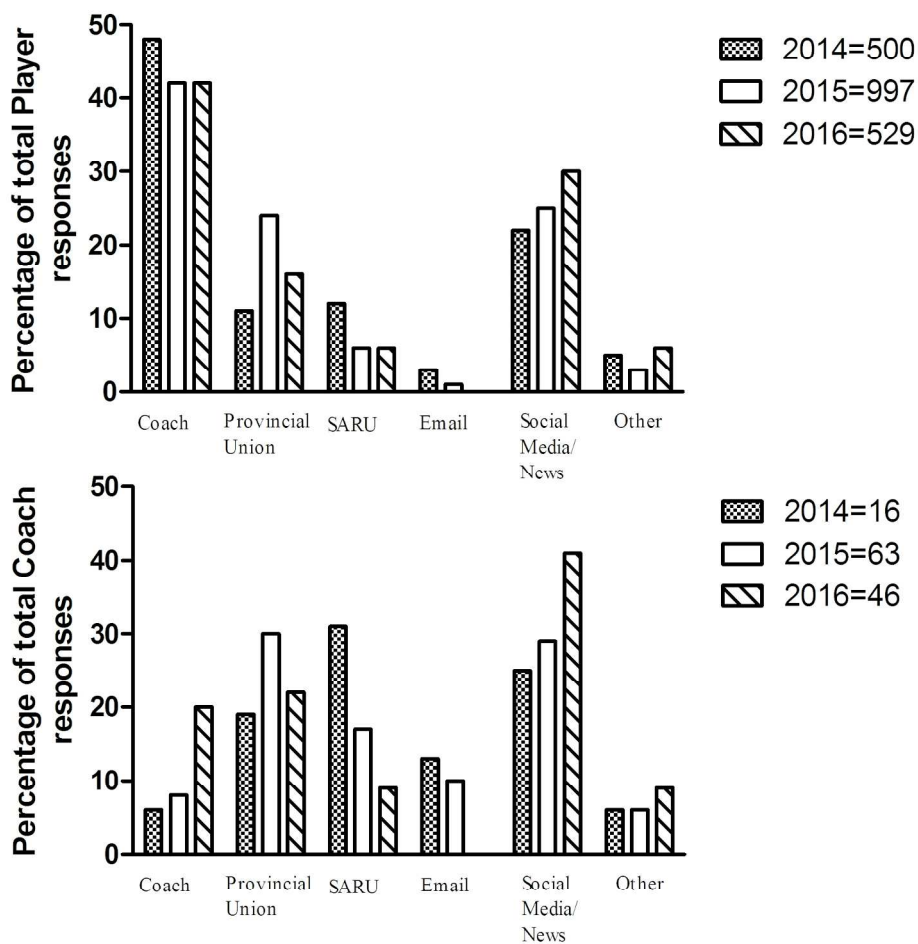

Figure 1: Coaches' and players' responses to the question "How did you come to hear about the BokSmart Safe Six?" (participants could choose multiple options).

184x191mm (300 x 300 DPI)

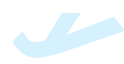



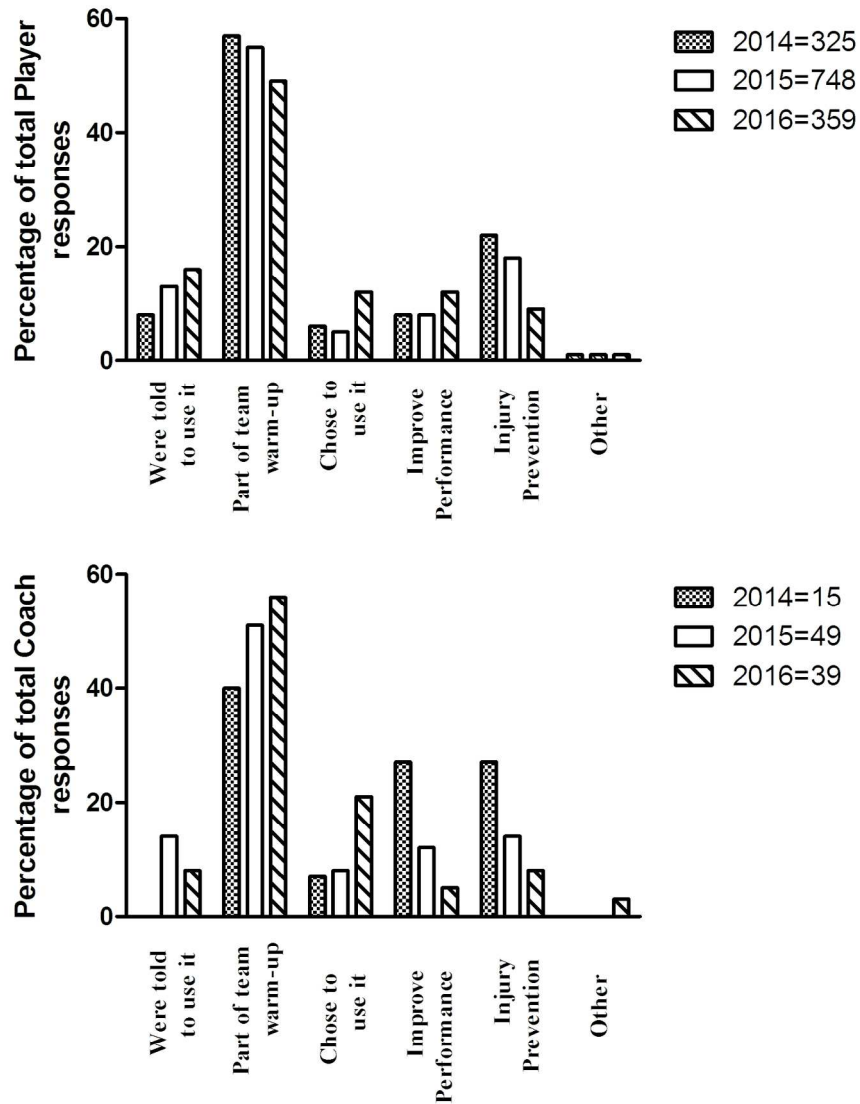

Figure 2: The coaches' and players' who claimed to use the exercises, these are their responses to the question "Why did you use the BokSmart Safe Six exercises?" (participants could tick multiple options).

154x197mm (300 x 300 DPI)

# BMJ Open

## Players' and Coaches' knowledge and awareness of the BokSmart Safe Six Injury Prevention Programme: an ecological cross sectional questionnaire study

|                                 |                                                                                                                                                                                                                                                                                                                                                                                                                                                         |
|---------------------------------|---------------------------------------------------------------------------------------------------------------------------------------------------------------------------------------------------------------------------------------------------------------------------------------------------------------------------------------------------------------------------------------------------------------------------------------------------------|
| Journal:                        | <i>BMJ Open</i>                                                                                                                                                                                                                                                                                                                                                                                                                                         |
| Manuscript ID                   | bmjopen-2017-018575.R1                                                                                                                                                                                                                                                                                                                                                                                                                                  |
| Article Type:                   | Research                                                                                                                                                                                                                                                                                                                                                                                                                                                |
| Date Submitted by the Author:   | 06-Sep-2017                                                                                                                                                                                                                                                                                                                                                                                                                                             |
| Complete List of Authors:       | Sewry, Nicola; University of Cape Town Research Unit for Exercise Science and Sports Medicine<br>Verhagen, Evert; VU University Medical Center, Public and Occupational Health<br>Lambert, Mike; Sports Science Institute of South Africa, MRC/UCT Research Unit for Exercise Science and Sports Medicine<br>Van Mechelen, Willem; VU University Medical Center, Public and Occupational Health<br>Brown, James; University of Cape Town, Human Biology |
| <b>Primary Subject Heading</b>: | Sports and exercise medicine                                                                                                                                                                                                                                                                                                                                                                                                                            |
| Secondary Subject Heading:      | Epidemiology                                                                                                                                                                                                                                                                                                                                                                                                                                            |
| Keywords:                       | injury prevention, awareness, cross-sectional, social media                                                                                                                                                                                                                                                                                                                                                                                             |
|                                 |                                                                                                                                                                                                                                                                                                                                                                                                                                                         |

SCHOLARONE™  
Manuscripts

Only

1  
2  
3 Players' and Coaches' knowledge and awareness of the BokSmart *Safe Six* Injury Prevention  
4 Programme: an ecological cross sectional questionnaire study  
5  
6

7 Nicola Sewry<sup>1</sup>  
8

9 Evert Verhagen<sup>1,2,3</sup>  
10

11 Mike Lambert<sup>1,2</sup>  
12

13 Willem van Mechelen<sup>1,2,4,5</sup>  
14

15 James Brown<sup>1,2</sup>  
16  
17

18 <sup>1</sup>Division of Exercise Science and Sports Medicine, Department of Human Biology,  
19 University of Cape Town, Cape Town, South Africa  
20

21 <sup>2</sup>Amsterdam Collaboration on Health and Safety in Sports, Department of Public and  
22 Occupational Health and Amsterdam Public Health Research Institute, VU University  
23 Medical Center, Amsterdam, The Netherlands  
24

25 <sup>3</sup>Australian Centre for Research into Injury in Sport and its Prevention (ACRISP), Federation  
26 University Australia, Ballarat, Australia  
27

28 <sup>4</sup>School of Human Movement and Nutrition Sciences, Faculty of Health and Behavioural  
29 Sciences, University of Queensland, Brisbane, Australia  
30

31 <sup>5</sup>School of Public Health, Physiotherapy and Population Sciences, University College Dublin,  
32 Dublin, Ireland  
33  
34  
35  
36  
37  
38  
39

40 Corresponding Author's Details:  
41

42 Evert Verhagen  
43

44 [e.verhagen@vumc.nl](mailto:e.verhagen@vumc.nl)  
45

46 Telephone Number: +31 20 4449691  
47

48 Fax Number: +31 20 4448387  
49  
50  
51  
52  
53  
54  
55  
56  
57  
58  
59  
60

1  
2  
3 Funding Statement  
4

5 NS's PhD is funded by the Vrije Universiteit Amsterdam / National Research Foundation South Africa through the Desmond  
6 Tutu Doctoral Scholarship, administered through the South Africa Vrije Universiteit Strategic Alliance (SAVUSA). NS also  
7 receives funding from the University of Cape Town, Zuid-Afrika Huis study foundation and the Oppenheimer Memorial  
8 Trust.  
9

10 Data Sharing Statement

11 All data is published, and therefore there is no additional data available. If raw data is requested, requests will be reviewed  
12 on a discretionary basis by BokSmart (who can be contacted via email through the corresponding author -  
13 swrnic009@myuct.ac.za).  
14

15 Competing Interests Statement

16 None.  
17  
18  
19  
20  
21  
22  
23  
24  
25  
26  
27  
28  
29  
30  
31  
32  
33  
34  
35  
36  
37  
38  
39  
40  
41  
42  
43  
44  
45  
46  
47  
48  
49  
50  
51  
52  
53  
54  
55  
56  
57  
58  
59  
60

## Abstract

### *Objectives*

Rugby has a high injury incidence and therefore BokSmart introduced the *Safe Six* injury prevention programme in 2014 in an attempt to decrease this incidence. In 2015, BokSmart used a “targeted marketing approach” to increase the awareness and knowledge of the *Safe Six*. Therefore, the aim of this study was to determine the change in the knowledge of coaches and players of the *Safe Six* programme, compared to the launch year, following a “targeted marketing approach”.

### *Design*

Ecological cross sectional questionnaire study

### *Setting*

The 2014 – 2016 South African rugby union youth week tournaments.

### *Participants*

Questionnaires were completed by 4,502 players and coaches who attended any of the four youth week tournaments during 2014 – 2016.

### *Outcome Measures*

Logistic regression (adjusted odds ratio, 95% CI) was performed in comparison to year prior to targeted marketing, separately for coaches and players, for changes in awareness and knowledge.

### *Results*

The awareness of the *Safe Six* increased significantly for players in 2015 (1.74 times [1.49; 2.04]) and in 2016 (1.54 times [1.29; 1.84]). Similarly for coaches, there was a 3.55 times [1.23; 9.99] increase in 2015 and a 10.11 times [2.43; 42.08] increase in 2016 compared to 2014. Furthermore, a player was significantly more likely to be aware of the *Safe Six* if his coach was aware of the programme ( $p < 0.05$ ).

### *Conclusions*

The knowledge and awareness of the BokSmart *Safe Six* of both players and coaches increased in 2015 and 2016 (compared to 2014) since the launch of the programme. Coaches, the Unions/SARU and social media were the largest contributors to knowledge in coaches and players. Whilst the “targeted marketing approach” was associated with an increase in awareness, future studies should determine if this translates into behavioural change.

## Strengths and Limitations of the Study

- This study is novel as it looks at what sources South African coaches and players received their BokSmart injury prevention information from.
- The findings could help BokSmart and other nationwide injury prevention programmes target audiences more effectively.
- The number of repeat participants completing the survey in consecutive years is unknown and assumed to be minimal.
- The results are self-reported and not observed behaviour and should be interpreted with caution.

For peer review only

## Introduction

Rugby union (hence referred to as “rugby”) is a sport played globally and has a high risk of injury when compared to other sports.[1-3] Owing to this high risk, multiple nationwide injury prevention programmes have been designed and implemented in various countries, such as RugbySmart in New Zealand and Smart Rugby in Australia.[4, 5] In South Africa, the South African Rugby Union (SARU) developed and implemented BokSmart in an attempt to decrease the injury burden through research-based initiatives.[6]

The BokSmart injury prevention programme focuses its initiatives through mandatory biennial courses, which are DVD-facilitated workshops for all coaches and referees in South Africa.[7] RugbySmart also targets the coaches and referees, and has been associated with decreases in spinal cord injuries and overall injury rates in specifically targeted areas.[8, 9] There was also an increase in “safe” behaviours in the contact situations following the introduction of RugbySmart.[8] Similarly, the BokSmart programme has also been associated with improvements in injury prevention behaviours in players, which is hypothesised to lead to a decrease in injuries.[10, 11] Furthermore, BokSmart has been associated with a decrease in catastrophic injuries in junior rugby players in South Africa.[12] These studies all indicate that the coach-targeted approach for injury prevention in rugby is successful.[11] These studies were all quantitative and descriptive studies, which provide information regarding changes over time in injury rates, knowledge and awareness of the programme and allow for inferences to be made.

Following the success of the BokSmart programme, BokSmart further developed and implemented the *Safe Six* exercise-based injury prevention programme in the beginning of 2014 (<http://boksmart.sarugby.co.za/content/safe-six>). The BokSmart *Safe Six* programme is coach-targeted, and aimed at being implemented as a warm-up before training or competition.[13] The *Safe Six* was developed using clinical knowledge and research to address the most commonly occurring injuries in rugby union, and was designed to be implemented by rugby players of all ages. Following the introduction in 2014, no explicit marketing was performed (deemed the “pre” marketing period). Subsequently in 2015, prior to the annual SARU youth week tournaments, a “targeted marketing approach” was taken using emails to the respective youth week teams’ coaches, provincial unions and SARU. As with all BokSmart programmes, whilst the *Safe Six* is coach-targeted, it is hypothesised that there will be knowledge transfer from the coaches to the players.

This study had three aims. Firstly, to determine the change in the knowledge of coaches and players of the *Safe Six* programme, compared to the launch year, following a targeted marketing approach. Secondly, to evaluate whether a coach-targeted intervention approach is associated with player knowledge and awareness of the *Safe Six* programme. Finally, to explore the reasons why coaches and players use the *Safe Six* programme.

## Methods

### *Participants*

The players and coaches of all South African teams attending the SARU youth week tournaments in 2014, 2015 and 2016 were invited to complete a questionnaire (not the same

1  
2  
3 players every year, but all players at all tournaments every year). The youth week  
4 tournaments are an annual opportunity to showcase the talent of the best youth rugby players  
5 in South Africa's various provincial unions. The youth week tournaments included in this  
6 study were the Under 13 Craven Week, U16 Grant Khomo Week, Under 18 Academy Week,  
7 Under 18 Craven Week, Under 18 Learners with Special Education Needs (LSEN) Week and  
8 Under 17 Sevens Tournament. The players and coaches were asked to complete the  
9 questionnaire independently at any point during the tournament and to return it to the  
10 tournament medical officer. Hard copies of the questionnaire were distributed to the players  
11 and coaches and their hand written responses were transferred into Excel for data entry and  
12 then into SPSS for statistical analysis. Each coach, parent of a player under the age of 18 and  
13 player gave written consent prior to the tournament to be involved in the study and the study  
14 received ethical clearance from the Human Research Ethics Committee of the University of  
15 Cape Town (HREC 108/2017).  
16  
17  
18  
19

### 20 *BokSmart Safe Six Targeted Marketing*

21 In 2014 BokSmart launched the *Safe Six* programme, but did not perform any explicit  
22 marketing; this is deemed the "pre" marketing period for the current study. In 2015, before  
23 the youth week tournaments, a targeted marketing approach was taken, using emails  
24 (including the full *Safe Six* programme) to the respective youth week coaches; i.e. provincial  
25 unions and SARU both provided informative material to all coaches attending the youth  
26 weeks. The social media accounts of SA Rugby Youth Weeks (10 172 Facebook and 1 959  
27 Twitter followers, 2017) and BokSmart (4 060 Facebook and 2 996 Twitter followers, 2017)  
28 were used as platforms to market the *Safe Six* programme, and so the 2015 year is the  
29 "during" marketing period. The social media marketing included copies of the *Safe Six*  
30 posters (details regarding the exercises, repetitions and images) and links to YouTube  
31 instructional videos. This targeted marketing took place during the ten weeks leading up to all  
32 the tournaments in 2015. In 2016, similarly to 2014, no specific marketing was made towards  
33 those attending the youth weeks and can be considered the "post" marketing period.  
34  
35  
36  
37  
38

### 39 *Questionnaire*

40 The questionnaire was designed by BokSmart to determine the players' and coaches'  
41 knowledge, behaviour and awareness of the *Safe Six* injury prevention programme. The  
42 BokSmart *Safe Six* is targeted at the coach and therefore the questionnaire (supplementary  
43 material I) assesses knowledge (of the BokSmart *Safe Six*) and its transfer to behaviour  
44 (reported usage of the BokSmart *Safe Six*) of the coaches, as well as the barriers and  
45 facilitators in this process. The questionnaire also assesses the fidelity of knowledge by  
46 requiring the participants to correctly name the exercises included in the BokSmart *Safe Six*  
47 programme. Following this, the BokSmart coach-targeted approach would assume that this  
48 knowledge of the programme would transfer from the coach to the player, and therefore, the  
49 questionnaire also assesses the knowledge and behaviour of the players regarding the  
50 BokSmart *Safe Six*.  
51  
52  
53  
54

### 55 *Statistics*

56 Descriptive statistics were performed on the tournaments, the participants, their roles and  
57 their responses. Logistic regression was performed to determine an adjusted odds ratio (aOR,  
58  
59  
60



with 95% CIs) (adjusting for team role and year) on various binary outcomes (yes or no). All analyses were performed using IBM SPSS Statistics 23 (2015). Statistical significance was accepted when the  $p < 0.05$ .

## Results

Over the three years of data collection a total of 4,502 participants completed the questionnaire from six different tournaments in three consecutive years. Of the participants, 92% were players, and the rest were coaches or of unknown role (Table 1).

Table 1: The team roles of participants who completed the questionnaire ( $n=4502$ ).

| Team Role    | 2014        | 2015        | 2016        | Total       |
|--------------|-------------|-------------|-------------|-------------|
| Coach        | 27          | 52          | 33          | 112         |
| Player       | 1351        | 1715        | 1070        | 4136        |
| Unknown      | 136         | 80          | 38          | 254         |
| <b>Total</b> | <b>1514</b> | <b>1847</b> | <b>1141</b> | <b>4502</b> |

For players, the awareness of the *Safe Six* increased significantly in 2015 (1.74 times [1.49; 2.04]) and in 2016 (1.54 times [1.29; 1.84]) compared to 2014 (Table 2). Similarly, for coaches, there was a 3.55 times [1.23; 9.99] increase in 2015 and a 10.11 times [2.43; 42.08] increase in 2016 compared to 2014. However, the difference between 2015 and 2016 for both coaches and players was not significant.

Table 2: Responses to the question "Have you ever heard of the BokSmart Safe Six?" ( $n=4050$ , unknown role=245, blank=207).

| Team Role    | 2014            |                 | 2015             |                 | 2016            |                 | Total            |                  |
|--------------|-----------------|-----------------|------------------|-----------------|-----------------|-----------------|------------------|------------------|
|              | No              | Yes             | No               | Yes             | No              | Yes             | No               | Yes              |
| Coach n (%)  | 13 (52)         | 12 (48)         | 11 (23)          | 36 (77)         | 3 (10)          | 28 (90)         | 27 (26)          | 76 (74)          |
| Player n (%) | 946 (73)        | 341 (27)        | 1002 (62)        | 627 (38)        | 663 (64)        | 368 (36)        | 2611 (66)        | 1336 (34)        |
| <b>Total</b> | <b>959 (73)</b> | <b>353 (27)</b> | <b>1013 (60)</b> | <b>663 (40)</b> | <b>666 (63)</b> | <b>396 (37)</b> | <b>2638 (65)</b> | <b>1412 (35)</b> |

Furthermore, in 2015 players were 4.94 [2.78; 8.80] times more likely to be aware of the *Safe Six* if their respective coaches were aware of the programme (Table 3).

Table 3: The players' responses related to what their respective coaches answered to the question "Have you ever heard of the BokSmart Safe Six?" during 2015 (number of coaches = 47).

| Coaches' Response | Players' Response % (n) |                 |                  |
|-------------------|-------------------------|-----------------|------------------|
|                   | No                      | Yes             | Total            |
| <b>No</b>         | 20 (123)                | 2 (11)          | 22 (134)         |
| <b>Yes</b>        | 46 (278)                | 32 (190)        | 78 (468)         |
| <b>Total</b>      | <b>66 (401)</b>         | <b>34 (201)</b> | <b>100 (602)</b> |

SARU (2014), provincial unions (2015) and social media/news (2016) were the largest sources of information of the *Safe Six* over the years for coaches (Figure 1). For players, the largest source of information regarding the *Safe Six* was through coaches, social media/news was the second largest and the provincial unions were also large contributors to the dissemination of knowledge.

The participants were asked to name the six exercises, this was open-ended and retrospectively coded correct or not. The correct answers were tallied and the results are shown in Table 4. It was not possible to calculate percentages because of incorrect answers and some players answering more than others. The overall finding was that the players had a poor ability to name the exercises, and these were then assessed to be correct and tallied up. Multiple participants could name some of the six exercises, but not all of them, and different combinations of the exercises. Table 4 therefore illustrates the number of the total participants that could correctly name specific exercises. Percentages were not possible to calculate due to incorrect answers and some answering more than others. This result showed poor ability to name the exercises.

Table 4: The number of correct answers when the participants were asked to list as many of the BokSmart Safe Six exercises as they could remember in 2015 only.

| Exercise              | Coach | Players | Total |
|-----------------------|-------|---------|-------|
| Six Meter Shuttle Run | 22    | 321     | 343   |
| Six Point Lunge       | 19    | 294     | 313   |
| Buttsmart Six         | 14    | 257     | 271   |
| Six-on-a-Side Push Up | 16    | 247     | 263   |
| Six Bok Lunge         | 18    | 223     | 241   |
| Six Dynamic Reaches   | 17    | 139     | 156   |

In 2015 the reported usage of the *Safe Six* exercises was significantly higher for players than that of 2014 (aOR = 1.75 [1.36; 2.26]), but in 2016 there was no significant change compared to 2014 (Table 5). For coaches, the usage was significantly higher in 2015, with a 4.14 times [1.15; 14.92] increase, however in 2016 there was no significant change when compared to 2014. If a participant had answered “no” to “have they ever heard of the BokSmart Safe Six” they were screened to not be included in this question, however if they left that question blank, they could be included.

Table 5: Participants' responses to the question “In the last 6-8 weeks have you ever used the BokSmart Safe Six exercises?” (n=1,599, blank=48).

| Team Role    | 2014     |          | 2015     |          | 2016     |          | Total    |          |
|--------------|----------|----------|----------|----------|----------|----------|----------|----------|
|              | No       | Yes      | No       | Yes      | No       | Yes      | No       | Yes      |
| Coach n (%)  | 8 (50)   | 8 (50)   | 7 (19)   | 29 (81)  | 6 (21)   | 22 (79)  | 21 (26)  | 59 (74)  |
| Player n (%) | 146 (43) | 195 (57) | 224 (32) | 466 (68) | 233 (53) | 207 (47) | 603 (41) | 868 (59) |
| Total n (%)  | 154 (43) | 203 (57) | 231 (32) | 495 (68) | 239 (51) | 229 (49) | 624 (40) | 927 (60) |

1  
2  
3  
4  
5  
6  
7  
8  
9  
10  
11  
12  
13  
14  
15  
16  
17  
18  
19  
20  
21  
22  
23  
24  
25  
26  
27  
28  
29  
30  
31  
32  
33  
34  
35  
36  
37  
38  
39  
40  
41  
42  
43  
44  
45  
46  
47  
48  
49  
50  
51  
52  
53  
54  
55  
56  
57  
58  
59  
60

The largest number of participants reported using the Safe Six because it was “part of their team warm-up” (over all the years) (Figure 2).

For peer review only

## Discussion

Overall there were significant changes in the awareness and knowledge of the coaches' and players' of the BokSmart *Safe Six* injury prevention programme. Furthermore, there was a significant relationship between the knowledge and awareness of coaches and their respective players. This finding supports BokSmart's coach-targeted approach.

Awareness of the *Safe Six* increased in 2015 and 2016 compared to 2014, in coaches and players following the targeted marketing period. The coaches' knowledge and awareness of the *Safe Six* was significantly higher than that of the players', which was to be expected because BokSmart as a whole and specifically the *Safe Six* is a coach-targeted programme.[7] Furthermore, when comparing the coaches' knowledge and awareness to their respective players' knowledge and awareness, there was a significant relationship in the marketing year, indicating that the coach-driven approach was effective in knowledge transfer to the players. Furthermore, when considering the reported use of the exercises, in 2016 more than half of the players reported not using the exercises, whereas the majority of coaches reported that they did use the exercises. Whilst the question might over-estimate the implementation of the exercises, either the coaches are showing social desirability bias or the knowledge transfer from coach to player appears to have decreased. If it is the latter, at least the exercises are still being implemented. This relationship, and the consequences of this relationship has been illustrated in other studies in rugby. In New Zealand, RugbySmart is a coach-targeted programme, which has been associated with an increase in injury preventing behaviours in players.[8] In South Africa, the BokSmart programme as a whole has also been associated with positive changes in injury prevention behaviours in the players.[10] Other more specific exercise-based injury prevention programmes have also been coach-targeted, with their results indicating a preventive effect (in certain areas, not overall injuries) for the players.[14, 15] These programmes indicate that coach-targeted programmes have the desired effect on the players they are trying to reach.

However, when further analysing the fidelity of knowledge of the coaches and players of the *Safe Six*, their ability to name the exercises was poor, compared to the total number of participants. Therefore, if the *Safe Six* is a programme important to BokSmart, and is potentially effective in preventing injuries,[13] it is suggested that BokSmart continues to perform the marketing measures on an annual basis (more than just incorporated into the current BokSmart biennial courses)[7] to reach the target audiences and to increase the use of the programme.

As mentioned above, the *Safe Six* programme was designed as an injury prevention programme, but exploring the arguments as to why players and coaches implement the exercises is important to understand. The explanations for use of the *Safe Six* programme were predominantly for the warm-up in both the players and coaches, however, the second most popular explanation for players was injury prevention and for coaches was to improve performance. The programme was designed to be incorporated into the warm-up as an injury prevention programme, and therefore is being used as intended. However, there could also be a "misconception" between coaches that the *Safe Six* is a performance enhancement

1  
2  
3 programme, instead of an injury prevention programme. It must be noted that a significant  
4 number of both the coaches and players perceived the *Safe Six* to be easy to use (which was  
5 BokSmart's goal when designing the programme), which therefore did not hamper their  
6 experiences regarding the programme.  
7

8  
9 The source of information varied between coaches and players. The coaches reported  
10 receiving most of their information from social media/news. Coaches received  
11 communication from their respective provincial unions who are governed by SARU, and  
12 therefore this relationship was expected. Social media/news were especially targeted in the  
13 marketing period using mostly the Twitter and Facebook BokSmart accounts (2996 and 4065  
14 followers respectively) (April 2017). For the players, most heard of the *Safe Six* from their  
15 coaches. The next popular source of hearing about the programme was from social  
16 media/news. This raises an interesting method of communicating for injury prevention  
17 awareness. The method was free and proved effective in reaching both the coaches and  
18 players. Social media and phone applications have become a new form of implementation for  
19 injury prevention programmes.[16, 17] In a review of phone-based injury prevention  
20 applications there were eighteen applications which claimed to have sports or health benefits.  
21 [16] Such findings indicate a shift towards the technology-based form of injury prevention  
22 methods. Whilst these applications may not all have been based on scientific principles, they  
23 still attract attention.  
24  
25  
26  
27

28 While technology-based reach can high, full utilization may be low. For example, an  
29 application focused on reducing ankle sprains had a low compliance once downloaded.[17]  
30 Therefore targeted efforts are required to ensure that the programme is used  
31 appropriately.[17] This principle could also be applied to the *Safe Six* where the reach and  
32 usage increased during the marketing period (possibly because of the social media exposure),  
33 and then decreased post-marketing. This is important knowledge for BokSmart and how they  
34 continue to disseminate knowledge regarding the *Safe Six* and future initiatives.  
35  
36  
37

### 38 Limitations

39  
40 This was a cross-sectional study with self-reported knowledge, usage and exposure.  
41 Therefore the results must be interpreted in this context. 44% of players could not be linked  
42 to a coach to determine the player/coach knowledge transfer, and this must be considered  
43 when interpreting those results. It must be noted that the percentage of repeat players  
44 completing the questionnaire in subsequent years is assumed to be minimal (as with all  
45 studies using the SARU youth week rugby tournaments as the cohort), however the coaches  
46 have never been assessed and there could be more repeat participants.[18-22]  
47  
48  
49  
50

### 51 Conclusion

52  
53  
54  
55 The knowledge and awareness of the BokSmart *Safe Six* of both players and coaches  
56 increased in 2015 and 2016 (compared to 2014) since the launch of the programme, however,  
57 did slightly decrease during the post-marketing period. The coaches reported receiving their  
58  
59  
60

1  
2  
3 information regarding the *Safe Six* from the Unions/SARU and social media/news. The  
4 information for the players, came from the coaches and social media/news. Reported usage of  
5 the programme increased in 2015 (i.e. the marketing period), but decreased to the pre-  
6 marketing levels in 2016. Finally the reasons for using the programme were predominantly  
7 for the warm-up, injury prevention and for performance improvements. The information  
8 gathered in this study will help with designing targeted marketing for future programmes and  
9 for further promotion of the BokSmart *Safe Six*. It also provides insight into the perceptions  
10 of the coaches and players regarding the *Safe Six* and therefore allows for BokSmart to make  
11 adjustments accordingly.  
12  
13  
14  
15  
16  
17  
18  
19  
20  
21  
22  
23  
24  
25  
26  
27  
28  
29  
30  
31  
32  
33  
34  
35  
36  
37  
38  
39  
40  
41  
42  
43  
44  
45  
46  
47  
48  
49  
50  
51  
52  
53  
54  
55  
56  
57  
58  
59  
60

## References

1. Brooks J, Kemp S. Recent trends in rugby union injuries. *Clinical Sports Medicine*, 2008:51-73.
2. Hootman JM, Dick R, Agel J. Epidemiology of Collegiate Injuries for 15 Sports: Summary and Recommendations for Injury Prevention Initiatives. *J Athl Train* 2007;42(2):311-19
3. Williams S, Trewartha G, Kemp S, Stokes K. A meta-analysis of injuries in senior men's professional Rugby Union. *Sports Med*. 2013;43(10):1043-55
4. Union AR. Key points for the tackler and ball-carrier, Australian Rugby Union SmartRugby: Confidence in contact. A guide to the SmartRugby Program., 2008:18-19.
5. Union NZR. Technique: the key factors in the tackle and taking the ball into contact. RugbySmart 2007: A guide to injury prevention for peak performance., 2007:12-14.
6. Rugby S. BokSmart: safe and effective techniques in rugby - practical guidelines., 2009.
7. Viljoen W, Patricios J. BokSmart – implementing a National Rugby Safety Programme. *Br J Sports Med*. 2012;46(10):692-93.
8. Gianotti SM, Quarrie KL, Hume PA. Evaluation of RugbySmart: A rugby union community injury prevention programme. *J Sci Med Sport*. 2009;12(3):371-75.
9. Quarrie KL, Gianotti SM, Hopkins WG, Hume PA. Effect of nationwide injury prevention programme on serious spinal injuries in New Zealand rugby union: ecological study. *BMJ* 2007;334(7604):1150.
10. Brown JC, Gardner-Lubbe S, Lambert MI, Van Mechelen W, Verhagen E. The BokSmart intervention programme is associated with improvements in injury prevention behaviours of rugby union players: an ecological cross-sectional study. *Inj Prev*. 2015;21(3):173-78.
11. Brown JC, Gardner-Lubbe S, Lambert MI, van Mechelen W, Verhagen E. Coach-directed education is associated with injury-prevention behaviour in players: an ecological cross-sectional study. *Br J Sports Med*. 2016.
12. Brown JC, Verhagen E, Knol D, Van Mechelen W, Lambert MI. The effectiveness of the nationwide BokSmart rugby injury prevention program on catastrophic injury rates. *Scand J Med Sci Sports*. 2016;26(2):221-25.
13. Sewry N, Verhagen E, Lambert M, van Mechelen W, Brown J. Evaluation of the Effectiveness and Implementation of the BokSmart Safe Six Injury Prevention Programme: a study protocol. *Inj Prev*. 2016:injuryprev-2016
14. Finch CF, Twomey DM, Fortington LV, et al. Preventing Australian football injuries with a targeted neuromuscular control exercise programme: comparative injury rates from a training intervention delivered in a clustered randomised controlled trial. *Inj Prev*. 2015:injuryprev-2015.
15. Hislop M, Stokes K, Williams S, et al. The efficacy of a movement control exercise programme to prevent injuries in youth rugby: a cluster-randomised controlled trial. *Br J Sports Med*. 2017;51(4):330-31.
16. van Mechelen DM, van Mechelen W, Verhagen EALM. Sports injury prevention in your pocket?! Prevention apps assessed against the available scientific evidence: a review. *Br J Sports Med*. 2014;48(11):878-82.
17. Vriend I, Coehoorn I, Verhagen E. Implementation of an App-based neuromuscular training programme to prevent ankle sprains: a process evaluation using the RE-AIM Framework. *Br J Sports Med*. 2015;49(7):484-88.
18. Brown J, Verhagen E, Viljoen W, et al. The incidence and severity of injuries at the 2011 South African Rugby Union (SARU) Youth Week tournaments. *South Afr J Sports Med*. 2012:49-54.



- 1  
2  
3 19. Burger N, Lambert MI, Viljoen W, et al. Mechanisms and factors associated with tackle-  
4 related injuries in South African Youth Rugby Union players. *Am J Sports Med.*  
5 2017;45(2):278-85  
6  
7 20. Burger N, Lambert MI, Viljoen W, Brown JC, Readhead C, Hendricks S. Tackle-related  
8 injury rates and nature of injuries in South African Youth Week tournament rugby union  
9 players (under-13 to under-18): an observational cohort study. *BMJ Open.* 2014;4(8)  
10  
11 21. Burger N, Lambert MI, Viljoen W, Brown JC, Readhead C, Hendricks S. Tackle  
12 technique and tackle-related injuries in high-level South African Rugby Union under-18  
13 players: real-match video analysis. *Br J Sports Med.* 2016;50(15):932-38  
14  
15 22. Mc Fie S, Brown J, Hendricks S, et al. Incidence and Factors Associated With  
16 Concussion Injuries at the 2011 to 2014 South African Rugby Union Youth Week  
17 Tournaments. *Clin. J. Sport Med.* 2016;26(5):398-404.  
18  
19  
20  
21  
22  
23  
24  
25  
26  
27  
28  
29  
30  
31  
32  
33  
34  
35  
36  
37  
38  
39  
40  
41  
42  
43  
44  
45  
46  
47  
48  
49  
50  
51  
52  
53  
54  
55  
56  
57  
58  
59  
60



Contributors:

NS was granted access to the data and was involved in conceptualising the manuscript; she also conducted statistical analyses and wrote the initial drafts of the manuscript. JB and EV were also involved in the statistical analyses. All authors (EV, ML, WvM and JB) were involved in conceptualising and editing drafts of the paper, in the order that they appear on the author list.

*Figure 1a): Players' responses to the question "How did you come to hear about the BokSmart Safe Six?" (participants could choose multiple options). b) Coaches' responses to the question "How did you come to hear about the BokSmart Safe Six?" (participants could choose multiple options).*

*Figure 2a): Players' who claimed to use the exercises, these are their responses to the question "Why did you use the BokSmart Safe Six exercises?" (participants could tick multiple options). b) Coaches' who claimed to use the exercises, these are their responses to the question "Why did you use the BokSmart Safe Six exercises?" (participants could tick multiple options).*

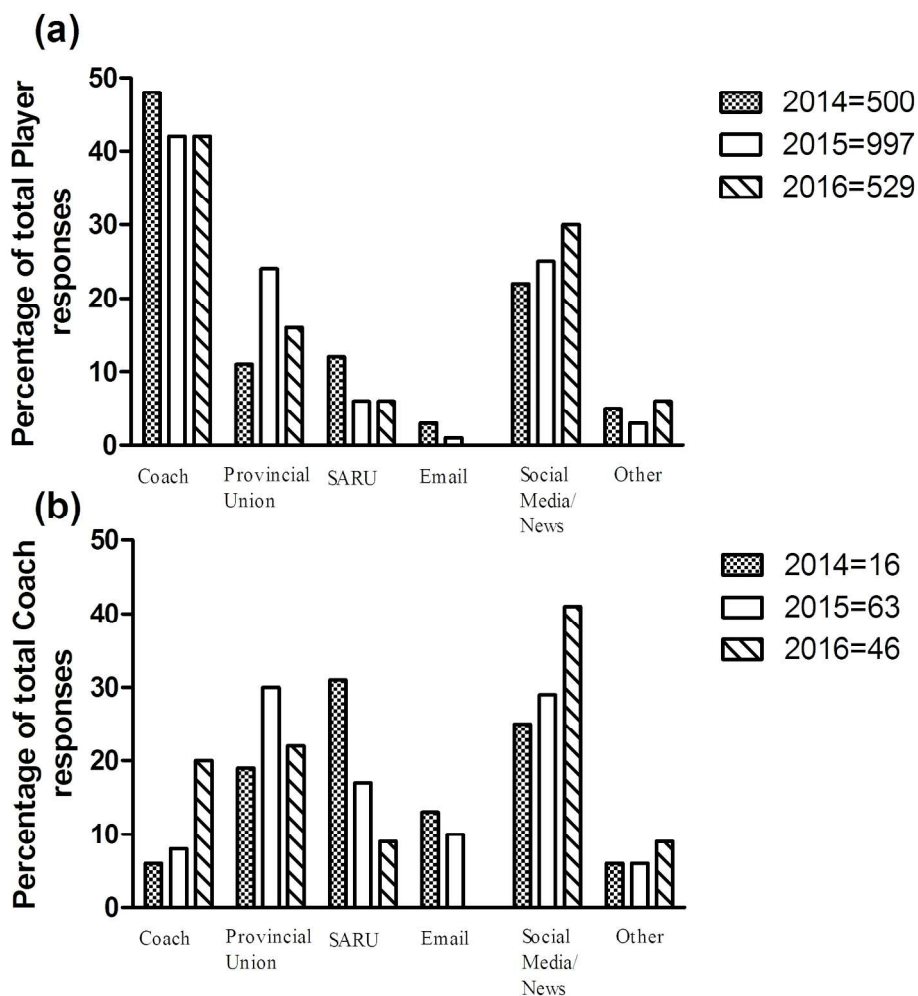

Figure 1a): Players' responses to the question "How did you come to hear about the BokSmart Safe Six?" (participants could choose multiple options). b) Coaches' responses to the question "How did you come to hear about the BokSmart Safe Six?" (participants could choose multiple options).

184x194mm (300 x 300 DPI)

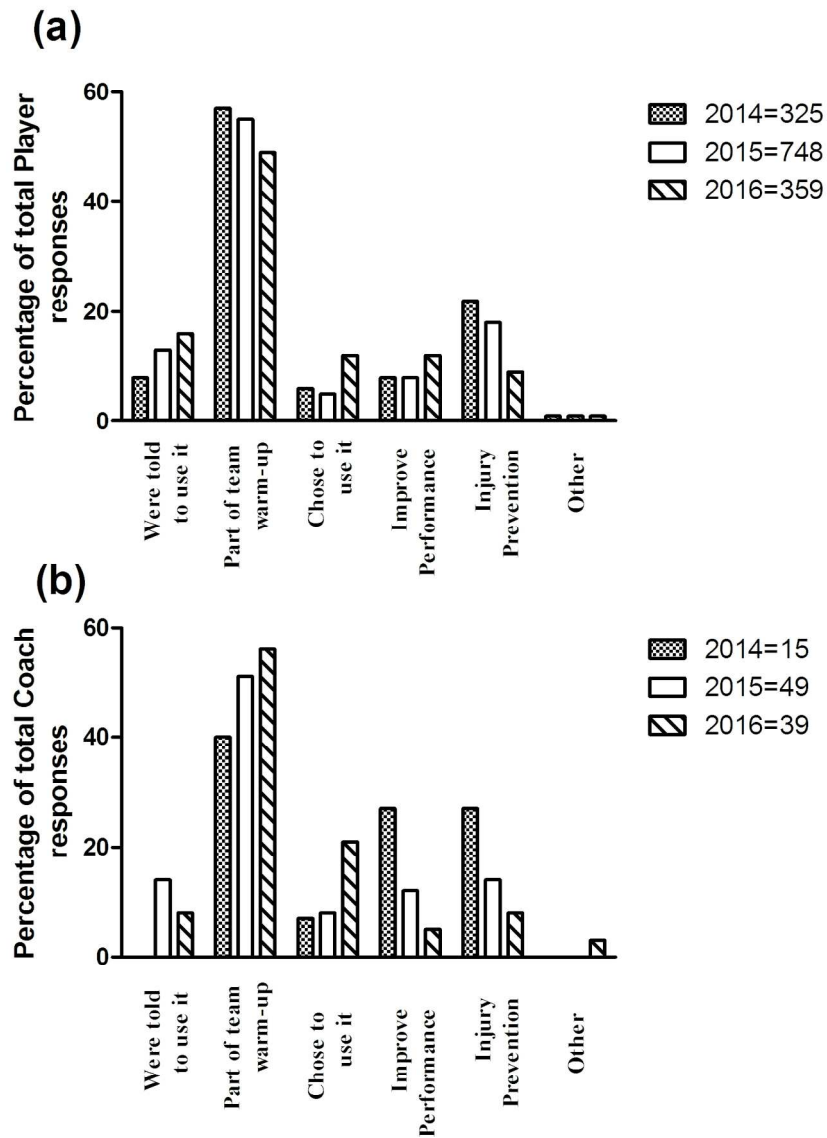

Figure 2a): Players' who claimed to use the exercises, these are their responses to the question "Why did you use the BokSmart Safe Six exercises?" (participants could tick multiple options). b) Coaches' who claimed to use the exercises, these are their responses to the question "Why did you use the BokSmart Safe Six exercises?" (participants could tick multiple options).

154x205mm (300 x 300 DPI)

1 **SARU MEDICAL DEPARTMENT SURVEY 2016**

2 **SARU YOUTH WEEK TOURNAMENTS**

3  
 4 U13 U16 LSEN U18 Academy Week U18 Craven Week

Team:

Province:

5 **BokSmart Safe Six Questionnaire**

6 *Please tick the box or circle the number that best matches your answer. Where required also provide a very brief and to the point comment*  
 7 *in the space provided! This questionnaire needs to be completed by ALL SARU Youth week players and team coaches.*

9 Please indicate your current role by ticking or circling the correct box i.e. whether you are the team coach, manager or a player

10  
 11  Team Coach  Team Manager  Player (  Forward  Backline )

13 **Questions**

14 1. Have you ever heard of the 'BokSmart Safe Six'? YES  NO

16 *If you answered YES to Question 1, then please continue with Question 2*

17 *If you answered NO to Question 1, then go to Question 9*

19 2. How did you come to hear about the 'BokSmart Safe Six'? (tick all boxes that are applicable)

20  Twitter  Website  Facebook  Coach  Provincial Union  News article  Poster  Email  SARU  Other (specify below)

27 3. Can you name any of the 'BokSmart Safe Six' exercises? YES  NO

29 *If you answered YES to Question 3, then please list as many of these as you can remember in the space provided below*

|       |    |    |
|-------|----|----|
| 31 1. | 3. | 5. |
| 32 2. | 4. | 6. |

34 4. In the last 6-8 weeks, have you ever used the 'BokSmart Safe Six' exercises? YES  NO

36 *If you answered YES to Question 4, then please continue with Question 5 below.*

37 *If you answered NO to Question 4, then please go to Question 8.*

39 5. Why did you use the 'BokSmart Safe Six' exercises? (tick all boxes that are applicable)

40  Were told to use it  Part of team warm-up  Chose to use it  Improve performance  Injury prevention  Other (specify below)

48 6. For how many weeks and on average, how many times per week did you use the 'BokSmart Safe Six' exercises?

50 **NUMBER OF WEEKS**  
 51  1  2  3  4  5  6  7  8 or more weeks

**AVERAGE DAYS PER WEEK**  
 52  1  2  3  4  5  6  7

53 7. Did you find the 'BokSmart Safe Six' exercises easy to perform? YES  NO

55 8. Why did you NOT use the 'BokSmart Safe Six' exercises?

59 9. Would you be interested in knowing more about the 'BokSmart Safe Six'? YES  NO

For peer review only - <http://bmjopen.bmj.com/site/about/guidelines.xhtml>

1  
2  
3  
4  
5  
6  
7  
8  
9  
10  
11  
12  
13  
14  
15  
16  
17  
18  
19  
20  
21  
22  
23  
24  
25  
26  
27  
28  
29  
30  
31  
32  
33  
34  
35  
36  
37  
38  
39  
40  
41  
42  
43  
44  
45  
46  
47  
48  
49  
50  
51  
52  
53  
54  
55  
56  
57  
58  
59  
60STROBE Statement—Checklist of items that should be included in reports of *cross-sectional studies*

| Pg Number |                              | Item No | Recommendation                                                                                                                                                                                                                                                                                                                             |
|-----------|------------------------------|---------|--------------------------------------------------------------------------------------------------------------------------------------------------------------------------------------------------------------------------------------------------------------------------------------------------------------------------------------------|
| 1         | <b>Title and abstract</b>    | 1       | (a) Indicate the study's design with a commonly used term in the title or the abstract                                                                                                                                                                                                                                                     |
| 3         |                              |         | (b) Provide in the abstract an informative and balanced summary of what was done and what was found                                                                                                                                                                                                                                        |
|           | <b>Introduction</b>          |         |                                                                                                                                                                                                                                                                                                                                            |
| 5         | Background/rationale         | 2       | Explain the scientific background and rationale for the investigation being reported                                                                                                                                                                                                                                                       |
| 5         | Objectives                   | 3       | State specific objectives, including any prespecified hypotheses                                                                                                                                                                                                                                                                           |
|           | <b>Methods</b>               |         |                                                                                                                                                                                                                                                                                                                                            |
| 5-6       | Study design                 | 4       | Present key elements of study design early in the paper                                                                                                                                                                                                                                                                                    |
| 5-6       | Setting                      | 5       | Describe the setting, locations, and relevant dates, including periods of recruitment, exposure, follow-up, and data collection                                                                                                                                                                                                            |
| 5-6       | Participants                 | 6       | (a) Give the eligibility criteria, and the sources and methods of selection of participants                                                                                                                                                                                                                                                |
| 6         | Variables                    | 7       | Clearly define all outcomes, exposures, predictors, potential confounders, and effect modifiers. Give diagnostic criteria, if applicable                                                                                                                                                                                                   |
| 6         | Data sources/<br>measurement | 8*      | For each variable of interest, give sources of data and details of methods of assessment (measurement). Describe comparability of assessment methods if there is more than one group                                                                                                                                                       |
|           | Bias                         | 9       | Describe any efforts to address potential sources of bias                                                                                                                                                                                                                                                                                  |
| 5         | Study size                   | 10      | Explain how the study size was arrived at                                                                                                                                                                                                                                                                                                  |
|           | Quantitative variables       | 11      | Explain how quantitative variables were handled in the analyses. If applicable, describe which groupings were chosen and why                                                                                                                                                                                                               |
| 6         | Statistical methods          | 12      | (a) Describe all statistical methods, including those used to control for confounding<br>(b) Describe any methods used to examine subgroups and interactions<br>(c) Explain how missing data were addressed<br>(d) If applicable, describe analytical methods taking account of sampling strategy<br>(e) Describe any sensitivity analyses |
|           | <b>Results</b>               |         |                                                                                                                                                                                                                                                                                                                                            |
| 7         | Participants                 | 13*     | (a) Report numbers of individuals at each stage of study—eg numbers potentially eligible, examined for eligibility, confirmed eligible, included in the study, completing follow-up, and analysed<br>(b) Give reasons for non-participation at each stage<br>(c) Consider use of a flow diagram                                            |
| 7         | Descriptive data             | 14*     | (a) Give characteristics of study participants (eg demographic, clinical, social) and information on exposures and potential confounders<br>(b) Indicate number of participants with missing data for each variable of interest                                                                                                            |
| 7-8       | Outcome data                 | 15*     | Report numbers of outcome events or summary measures                                                                                                                                                                                                                                                                                       |
| 7-8       | Main results                 | 16      | (a) Give unadjusted estimates and, if applicable, confounder-adjusted estimates and their precision (eg, 95% confidence interval). Make clear which confounders were adjusted for and why they were included                                                                                                                               |

|                          |                  |    |                                                                                                                                                                            |
|--------------------------|------------------|----|----------------------------------------------------------------------------------------------------------------------------------------------------------------------------|
|                          |                  |    | (b) Report category boundaries when continuous variables were categorized                                                                                                  |
|                          |                  |    | (c) If relevant, consider translating estimates of relative risk into absolute risk for a meaningful time period                                                           |
|                          | Other analyses   | 17 | Report other analyses done—eg analyses of subgroups and interactions, and sensitivity analyses                                                                             |
| <b>Discussion</b>        |                  |    |                                                                                                                                                                            |
| 9-10                     | Key results      | 18 | Summarise key results with reference to study objectives                                                                                                                   |
| 10                       | Limitations      | 19 | Discuss limitations of the study, taking into account sources of potential bias or imprecision. Discuss both direction and magnitude of any potential bias                 |
| 9-10                     | Interpretation   | 20 | Give a cautious overall interpretation of results considering objectives, limitations, multiplicity of analyses, results from similar studies, and other relevant evidence |
| 9-10                     | Generalisability | 21 | Discuss the generalisability (external validity) of the study results                                                                                                      |
| <b>Other information</b> |                  |    |                                                                                                                                                                            |
| 2                        | Funding          | 22 | Give the source of funding and the role of the funders for the present study and, if applicable, for the original study on which the present article is based              |

\*Give information separately for exposed and unexposed groups.

**Note:** An Explanation and Elaboration article discusses each checklist item and gives methodological background and published examples of transparent reporting. The STROBE checklist is best used in conjunction with this article (freely available on the Web sites of PLoS Medicine at <http://www.plosmedicine.org/>, Annals of Internal Medicine at <http://www.annals.org/>, and Epidemiology at <http://www.epidem.com/>). Information on the STROBE Initiative is available at [www.strobe-statement.org](http://www.strobe-statement.org).

# BMJ Open

## Players' and Coaches' knowledge and awareness of the BokSmart Safe Six Injury Prevention Programme: an ecological cross sectional questionnaire study

|                                 |                                                                                                                                                                                                                                                                                                                                                                                       |
|---------------------------------|---------------------------------------------------------------------------------------------------------------------------------------------------------------------------------------------------------------------------------------------------------------------------------------------------------------------------------------------------------------------------------------|
| Journal:                        | <i>BMJ Open</i>                                                                                                                                                                                                                                                                                                                                                                       |
| Manuscript ID                   | bmjopen-2017-018575.R2                                                                                                                                                                                                                                                                                                                                                                |
| Article Type:                   | Research                                                                                                                                                                                                                                                                                                                                                                              |
| Date Submitted by the Author:   | 26-Sep-2017                                                                                                                                                                                                                                                                                                                                                                           |
| Complete List of Authors:       | Sewry, Nicola; University of Cape Town Research Unit for Exercise Science and Sports Medicine<br>Verhagen, Evert; VU University Medical Center, Public and Occupational Health<br>Lambert, Mike; University of Cape Town, Human biology<br>Van Mechelen, Willem; VU University Medical Center, Public and Occupational Health<br>Brown, James; University of Cape Town, Human Biology |
| <b>Primary Subject Heading</b>: | Sports and exercise medicine                                                                                                                                                                                                                                                                                                                                                          |
| Secondary Subject Heading:      | Epidemiology                                                                                                                                                                                                                                                                                                                                                                          |
| Keywords:                       | injury prevention, awareness, cross-sectional, social media                                                                                                                                                                                                                                                                                                                           |
|                                 |                                                                                                                                                                                                                                                                                                                                                                                       |

SCHOLARONE™  
Manuscripts

Only

1  
2  
3 Players' and Coaches' knowledge and awareness of the BokSmart *Safe Six* Injury Prevention  
4 Programme: an ecological cross sectional questionnaire study  
5  
6

7 Nicola Sewry<sup>1</sup>  
8

9 Evert Verhagen<sup>1,2,3</sup>  
10

11 Mike Lambert<sup>1,2</sup>  
12

13 Willem van Mechelen<sup>1,2,4,5</sup>  
14

15 James Brown<sup>1,2</sup>  
16  
17

18 <sup>1</sup>Division of Exercise Science and Sports Medicine, Department of Human Biology,  
19 University of Cape Town, Cape Town, South Africa  
20

21 <sup>2</sup>Amsterdam Collaboration on Health and Safety in Sports, Department of Public and  
22 Occupational Health and Amsterdam Public Health Research Institute, VU University  
23 Medical Center, Amsterdam, The Netherlands  
24

25 <sup>3</sup>Australian Centre for Research into Injury in Sport and its Prevention (ACRISP), Federation  
26 University Australia, Ballarat, Australia  
27

28 <sup>4</sup>School of Human Movement and Nutrition Sciences, Faculty of Health and Behavioural  
29 Sciences, University of Queensland, Brisbane, Australia  
30

31 <sup>5</sup>School of Public Health, Physiotherapy and Population Sciences, University College Dublin,  
32 Dublin, Ireland  
33  
34  
35  
36  
37  
38  
39

40 Corresponding Author's Details:  
41

42 Evert Verhagen  
43

44 [e.verhagen@vumc.nl](mailto:e.verhagen@vumc.nl)  
45

46 Telephone Number: +31 20 4449691  
47

48 Fax Number: +31 20 4448387  
49  
50  
51  
52  
53  
54  
55  
56  
57  
58  
59  
60



1  
2  
3 Funding Statement

4 NS's PhD is funded by the Vrije Universiteit Amsterdam / National Research Foundation South Africa through the Desmond  
5 Tutu Doctoral Scholarship, administered through the South Africa Vrije Universiteit Strategic Alliance (SAVUSA). NS also  
6 receives funding from the University of Cape Town, Zuid-Afrika Huis study foundation and the Oppenheimer Memorial  
7 Trust.  
8  
9

10 Data Sharing Statement

11 All data is published, and therefore there is no additional data available. If raw data is requested, requests will be reviewed  
12 on a discretionary basis by BokSmart (who can be contacted via email through the corresponding author –  
13 e.verhagen@vumc.nl).  
14

15 Competing Interests Statement

16 None.  
17  
18  
19  
20  
21  
22  
23  
24  
25  
26  
27  
28  
29  
30  
31  
32  
33  
34  
35  
36  
37  
38  
39  
40  
41  
42  
43  
44  
45  
46  
47  
48  
49  
50  
51  
52  
53  
54  
55  
56  
57  
58  
59  
60

## Abstract

### *Objectives*

Rugby has a high injury incidence and therefore BokSmart introduced the *Safe Six* injury prevention programme in 2014 in an attempt to decrease this incidence. In 2015, BokSmart used a “targeted marketing approach” to increase the awareness and knowledge of the *Safe Six*. Therefore, the aim of this study was to determine the change in the knowledge of coaches and players of the *Safe Six* programme, compared to the launch year, following a “targeted marketing approach”.

### *Design*

Ecological cross sectional questionnaire study

### *Setting*

The 2014 – 2016 South African rugby union youth week tournaments.

### *Participants*

Questionnaires were completed by 4,502 players and coaches who attended any of the four youth week tournaments during 2014 – 2016.

### *Outcome Measures*

Logistic regression (adjusted odds ratio, 95% CI) was performed in comparison to year prior to targeted marketing, separately for coaches and players, for changes in awareness and knowledge.

### *Results*

The awareness of the *Safe Six* increased significantly for players in 2015 (1.74 times [1.49; 2.04]) and in 2016 (1.54 times [1.29; 1.84]). Similarly for coaches, there was a 3.55 times [1.23; 9.99] increase in 2015 and a 10.11 times [2.43; 42.08] increase in 2016 compared to 2014. Furthermore, a player was significantly more likely to be aware of the *Safe Six* if his coach was aware of the programme ( $p < 0.05$ ).

### *Conclusions*

The knowledge and awareness of the BokSmart *Safe Six* of both players and coaches increased in 2015 and 2016 (compared to 2014) since the launch of the programme. Coaches, the Unions/SARU and social media were the largest contributors to knowledge in coaches and players. Whilst the “targeted marketing approach” was associated with an increase in awareness, future studies should determine if this translates into behavioural change.

## Strengths and Limitations of the Study

- This study is novel as it looks at what sources South African coaches and players received their BokSmart injury prevention information from.
- The findings could help BokSmart and other nationwide injury prevention programmes target audiences more effectively.
- The number of repeat participants completing the survey in consecutive years is unknown and assumed to be minimal.
- The results are self-reported and not observed behaviour and should be interpreted with caution.

For peer review only

## Introduction

Rugby union (hence referred to as “rugby”) is a sport played globally and has a high risk of injury when compared to other sports.[1-3] Owing to this high risk, multiple nationwide injury prevention programmes have been designed and implemented in various countries, such as RugbySmart in New Zealand and Smart Rugby in Australia.[4, 5] In South Africa, the South African Rugby Union (SARU) developed and implemented BokSmart in an attempt to decrease the injury burden through research-based initiatives.[6]

The BokSmart injury prevention programme focuses its initiatives through mandatory biennial courses, which are DVD-facilitated workshops for all coaches and referees in South Africa.[7] RugbySmart also targets the coaches and referees, and has been associated with decreases in spinal cord injuries and overall injury rates in specifically targeted areas.[8, 9] There was also an increase in “safe” behaviours in the contact situations following the introduction of RugbySmart.[8] Similarly, the BokSmart programme has also been associated with improvements in injury prevention behaviours in players, which is hypothesised to lead to a decrease in injuries.[10, 11] Furthermore, BokSmart has been associated with a decrease in catastrophic injuries in junior rugby players in South Africa.[12] These studies all indicate that the coach-targeted approach for injury prevention in rugby is successful.[11] These studies were all quantitative and descriptive studies, which provide information regarding changes over time in injury rates, knowledge and awareness of the programme and allow for inferences to be made.

Following the success of the BokSmart programme, BokSmart further developed and implemented the *Safe Six* exercise-based injury prevention programme in the beginning of 2014 (<http://boksmart.sarugby.co.za/content/safe-six>). The BokSmart *Safe Six* programme is coach-targeted, and aimed at being implemented as a warm-up before training or competition.[13] The *Safe Six* was developed using clinical knowledge and research to address the most commonly occurring injuries in rugby union, and was designed to be implemented by rugby players of all ages. Following the introduction in 2014, no explicit marketing was performed (deemed the “pre” marketing period). Subsequently in 2015, prior to the annual SARU youth week tournaments, a “targeted marketing approach” was taken using emails to the respective youth week teams’ coaches, provincial unions and SARU. As with all BokSmart programmes, whilst the *Safe Six* is coach-targeted, it is hypothesised that there will be knowledge transfer from the coaches to the players.

This study had three aims. Firstly, to determine the change in the knowledge of coaches and players of the *Safe Six* programme, compared to the launch year, following a targeted marketing approach. Secondly, to evaluate whether a coach-targeted intervention approach is associated with player knowledge and awareness of the *Safe Six* programme. Finally, to explore the reasons why coaches and players use the *Safe Six* programme.

## Methods

### *Participants*

The players and coaches of all South African teams attending the SARU youth week tournaments in 2014, 2015 and 2016 were invited to complete a questionnaire (not the same

1  
2  
3 players every year, but all players at all tournaments every year). The youth week  
4 tournaments are an annual opportunity to showcase the talent of the best youth rugby players  
5 in South Africa's various provincial unions. The youth week tournaments included in this  
6 study were the Under 13 Craven Week, U16 Grant Khomo Week, Under 18 Academy Week,  
7 Under 18 Craven Week, Under 18 Learners with Special Education Needs (LSEN) Week and  
8 Under 17 Sevens Tournament. The players and coaches were asked to complete the  
9 questionnaire independently at any point during the tournament and to return it to the  
10 tournament medical officer. Hard copies of the questionnaire were distributed to the players  
11 and coaches and their hand written responses were transferred into Excel for data entry and  
12 then into SPSS for statistical analysis. Each coach, parent of a player under the age of 18 and  
13 player gave written consent prior to the tournament to be involved in the study and the study  
14 received ethical clearance from the Human Research Ethics Committee of the University of  
15 Cape Town (HREC 108/2017).  
16  
17  
18  
19

### 20 *BokSmart Safe Six Targeted Marketing*

21 In 2014 BokSmart launched the *Safe Six* programme, but did not perform any explicit  
22 marketing; this is deemed the "pre" marketing period for the current study. In 2015, before  
23 the youth week tournaments, a targeted marketing approach was taken, using emails  
24 (including the full *Safe Six* programme) to the respective youth week coaches; i.e. provincial  
25 unions and SARU both provided informative material to all coaches attending the youth  
26 weeks. The social media accounts of SA Rugby Youth Weeks (10 172 Facebook and 1 959  
27 Twitter followers, 2017) and BokSmart (4 060 Facebook and 2 996 Twitter followers, 2017)  
28 were used as platforms to market the *Safe Six* programme, and so the 2015 year is the  
29 "during" marketing period. The social media marketing included copies of the *Safe Six*  
30 posters (details regarding the exercises, repetitions and images) and links to YouTube  
31 instructional videos. This targeted marketing took place during the ten weeks leading up to all  
32 the tournaments in 2015. In 2016, similarly to 2014, no specific marketing was made towards  
33 those attending the youth weeks and can be considered the "post" marketing period.  
34  
35  
36  
37  
38

### 39 *Questionnaire*

40 The questionnaire was designed by BokSmart to determine the players' and coaches'  
41 knowledge, behaviour and awareness of the *Safe Six* injury prevention programme. The  
42 BokSmart *Safe Six* is targeted at the coach and therefore the questionnaire (supplementary  
43 material I) assesses knowledge (of the BokSmart *Safe Six*) and its transfer to behaviour  
44 (reported usage of the BokSmart *Safe Six*) of the coaches, as well as the barriers and  
45 facilitators in this process. The questionnaire also assesses the fidelity of knowledge by  
46 requiring the participants to correctly name the exercises included in the BokSmart *Safe Six*  
47 programme. Following this, the BokSmart coach-targeted approach would assume that this  
48 knowledge of the programme would transfer from the coach to the player, and therefore, the  
49 questionnaire also assesses the knowledge and behaviour of the players regarding the  
50 BokSmart *Safe Six*.  
51  
52  
53  
54

### 55 *Statistics*

56 Descriptive statistics were performed on the tournaments, the participants, their roles and  
57 their responses. Logistic regression was performed to determine an adjusted odds ratio (aOR,  
58  
59  
60

with 95% CIs) (adjusting for team role and year) on various binary outcomes (yes or no). All analyses were performed using IBM SPSS Statistics 23 (2015). Statistical significance was accepted when the  $p < 0.05$ .

## Results

Over the three years of data collection a total of 4,502 participants completed the questionnaire from six different tournaments in three consecutive years. Of the participants, 92% were players, and the rest were coaches or of unknown role (Table 1).

Table 1: The team roles of participants who completed the questionnaire ( $n=4502$ ).

| Team Role    | 2014        | 2015        | 2016        | Total       |
|--------------|-------------|-------------|-------------|-------------|
| Coach        | 27          | 52          | 33          | 112         |
| Player       | 1351        | 1715        | 1070        | 4136        |
| Unknown      | 136         | 80          | 38          | 254         |
| <b>Total</b> | <b>1514</b> | <b>1847</b> | <b>1141</b> | <b>4502</b> |

For players, the awareness of the *Safe Six* increased significantly in 2015 (1.74 times [1.49; 2.04]) and in 2016 (1.54 times [1.29; 1.84]) compared to 2014 (Table 2). Similarly, for coaches, there was a 3.55 times [1.23; 9.99] increase in 2015 and a 10.11 times [2.43; 42.08] increase in 2016 compared to 2014. However, the difference between 2015 and 2016 for both coaches and players was not significant.

Table 2: Responses to the question "Have you ever heard of the BokSmart Safe Six?" ( $n=4050$ , unknown role=245, blank=207).

| Team Role    | 2014            |                 | 2015             |                 | 2016            |                 | Total            |                  |
|--------------|-----------------|-----------------|------------------|-----------------|-----------------|-----------------|------------------|------------------|
|              | No              | Yes             | No               | Yes             | No              | Yes             | No               | Yes              |
| Coach n (%)  | 13 (52)         | 12 (48)         | 11 (23)          | 36 (77)         | 3 (10)          | 28 (90)         | 27 (26)          | 76 (74)          |
| Player n (%) | 946 (73)        | 341 (27)        | 1002 (62)        | 627 (38)        | 663 (64)        | 368 (36)        | 2611 (66)        | 1336 (34)        |
| <b>Total</b> | <b>959 (73)</b> | <b>353 (27)</b> | <b>1013 (60)</b> | <b>663 (40)</b> | <b>666 (63)</b> | <b>396 (37)</b> | <b>2638 (65)</b> | <b>1412 (35)</b> |

Furthermore, in 2015 players were 4.94 [2.78; 8.80] times more likely to be aware of the *Safe Six* if their respective coaches were aware of the programme (Table 3).

Table 3: The players' responses related to what their respective coaches answered to the question "Have you ever heard of the BokSmart Safe Six?" during 2015 (number of coaches = 47).

| Coaches' Response | Players' Response % (n) |                 |                  |
|-------------------|-------------------------|-----------------|------------------|
|                   | No                      | Yes             | Total            |
| <b>No</b>         | 20 (123)                | 2 (11)          | 22 (134)         |
| <b>Yes</b>        | 46 (278)                | 32 (190)        | 78 (468)         |
| <b>Total</b>      | <b>66 (401)</b>         | <b>34 (201)</b> | <b>100 (602)</b> |

SARU (2014), provincial unions (2015) and social media/news (2016) were the largest sources of information of the *Safe Six* over the years for coaches (Figure 1). For players, the largest source of information regarding the *Safe Six* was through coaches, social media/news was the second largest and the provincial unions were also large contributors to the dissemination of knowledge.

The overall finding was that the players had a poor ability to name the exercises. Multiple participants could name some of the six exercises, but not all of them, and different combinations of the exercises (Table 4).

Table 4: The number of correct answers when the participants were asked to list as many of the BokSmart Safe Six exercises as they could remember in 2015 only.

| Exercise              | Coach | Players | Total |
|-----------------------|-------|---------|-------|
| Six Meter Shuttle Run | 22    | 321     | 343   |
| Six Point Lunge       | 19    | 294     | 313   |
| Buttsmart Six         | 14    | 257     | 271   |
| Six-on-a-Side Push Up | 16    | 247     | 263   |
| Six Bok Lunge         | 18    | 223     | 241   |
| Six Dynamic Reaches   | 17    | 139     | 156   |

In 2015 the reported usage of the *Safe Six* exercises was significantly higher for players than that of 2014 (aOR = 1.75 [1.36; 2.26]), but in 2016 there was no significant change compared to 2014 (Table 5). For coaches, the usage was significantly higher in 2015, with a 4.14 times [1.15; 14.92] increase, however in 2016 there was no significant change when compared to 2014. If a participant had answered “no” to “have they ever heard of the BokSmart Safe Six” they were screened to not be included in this question, however if they left that question blank, they could be included.

Table 5: Participants’ responses to the question “In the last 6-8 weeks have you ever used the BokSmart Safe Six exercises?” (n=1,599, blank=48).

| Team Role    | 2014     |          | 2015     |          | 2016     |          | Total    |          |
|--------------|----------|----------|----------|----------|----------|----------|----------|----------|
|              | No       | Yes      | No       | Yes      | No       | Yes      | No       | Yes      |
| Coach n (%)  | 8 (50)   | 8 (50)   | 7 (19)   | 29 (81)  | 6 (21)   | 22 (79)  | 21 (26)  | 59 (74)  |
| Player n (%) | 146 (43) | 195 (57) | 224 (32) | 466 (68) | 233 (53) | 207 (47) | 603 (41) | 868 (59) |
| Total n (%)  | 154 (43) | 203 (57) | 231 (32) | 495 (68) | 239 (51) | 229 (49) | 624 (40) | 927 (60) |

The largest number of participants reported using the Safe Six because it was “part of their team warm-up” (over all the years) (Figure 2).



## Discussion

Overall there were significant changes in the awareness and knowledge of the coaches' and players' of the BokSmart *Safe Six* injury prevention programme. Furthermore, there was a significant relationship between the knowledge and awareness of coaches and their respective players. This finding supports BokSmart's coach-targeted approach.

Awareness of the *Safe Six* increased in 2015 and 2016 compared to 2014, in coaches and players following the targeted marketing period. The coaches' knowledge and awareness of the *Safe Six* was significantly higher than that of the players', which was to be expected because BokSmart as a whole and specifically the *Safe Six* is a coach-targeted programme.[7] Furthermore, when comparing the coaches' knowledge and awareness to their respective players' knowledge and awareness, there was a significant relationship in the marketing year, indicating that the coach-driven approach was effective in knowledge transfer to the players. Furthermore, when considering the reported use of the exercises, in 2016 more than half of the players reported not using the exercises, whereas the majority of coaches reported that they did use the exercises. Whilst the question might over-estimate the implementation of the exercises, either the coaches are showing social desirability bias or the knowledge transfer from coach to player appears to have decreased. If it is the latter, at least the exercises are still being implemented. This relationship, and the consequences of this relationship has been illustrated in other studies in rugby. In New Zealand, RugbySmart is a coach-targeted programme, which has been associated with an increase in injury preventing behaviours in players.[8] In South Africa, the BokSmart programme as a whole has also been associated with positive changes in injury prevention behaviours in the players.[10] Other more specific exercise-based injury prevention programmes have also been coach-targeted, with their results indicating a preventive effect (in certain areas, not overall injuries) for the players.[14, 15] These programmes indicate that coach-targeted programmes have the desired effect on the players they are trying to reach.

However, when further analysing the fidelity of knowledge of the coaches and players of the *Safe Six*, their ability to name the exercises was poor, compared to the total number of participants. Therefore, if the *Safe Six* is a programme important to BokSmart, and is potentially effective in preventing injuries,[13] it is suggested that BokSmart continues to perform the marketing measures on an annual basis (more than just incorporated into the current BokSmart biennial courses)[7] to reach the target audiences and to increase the use of the programme.

As mentioned above, the *Safe Six* programme was designed as an injury prevention programme, but exploring the arguments as to why players and coaches implement the exercises is important to understand. The explanations for use of the *Safe Six* programme were predominantly for the warm-up in both the players and coaches, however, the second most popular explanation for players was injury prevention and for coaches was to improve performance. The programme was designed to be incorporated into the warm-up as an injury prevention programme, and therefore is being used as intended. However, there could also be a "misconception" between coaches that the *Safe Six* is a performance enhancement



1  
2  
3 programme, instead of an injury prevention programme. It must be noted that a significant  
4 number of both the coaches and players perceived the *Safe Six* to be easy to use (which was  
5 BokSmart's goal when designing the programme), which therefore did not hamper their  
6 experiences regarding the programme.  
7

8  
9 The source of information varied between coaches and players. The coaches reported  
10 receiving most of their information from social media/news. Coaches received  
11 communication from their respective provincial unions who are governed by SARU, and  
12 therefore this relationship was expected. Social media/news were especially targeted in the  
13 marketing period using mostly the Twitter and Facebook BokSmart accounts (2996 and 4065  
14 followers respectively) (April 2017). For the players, most heard of the *Safe Six* from their  
15 coaches. The next popular source of hearing about the programme was from social  
16 media/news. This raises an interesting method of communicating for injury prevention  
17 awareness. The method was free and proved effective in reaching both the coaches and  
18 players. Social media and phone applications have become a new form of implementation for  
19 injury prevention programmes.[16, 17] In a review of phone-based injury prevention  
20 applications there were eighteen applications which claimed to have sports or health benefits.  
21 [16] Such findings indicate a shift towards the technology-based form of injury prevention  
22 methods. Whilst these applications may not all have been based on scientific principles, they  
23 still attract attention.  
24  
25  
26  
27

28 While technology-based reach can high, full utilization may be low. For example, an  
29 application focused on reducing ankle sprains had a low compliance once downloaded.[17]  
30 Therefore targeted efforts are required to ensure that the programme is used  
31 appropriately.[17] This principle could also be applied to the *Safe Six* where the reach and  
32 usage increased during the marketing period (possibly because of the social media exposure),  
33 and then decreased post-marketing. This is important knowledge for BokSmart and how they  
34 continue to disseminate knowledge regarding the *Safe Six* and future initiatives.  
35  
36  
37

### 38 Limitations

39  
40 This was a cross-sectional study with self-reported knowledge, usage and exposure.  
41 Therefore the results must be interpreted in this context. 44% of players could not be linked  
42 to a coach to determine the player/coach knowledge transfer, and this must be considered  
43 when interpreting those results. It must be noted that the percentage of repeat players  
44 completing the questionnaire in subsequent years is assumed to be minimal (as with all  
45 studies using the SARU youth week rugby tournaments as the cohort), however the coaches  
46 have never been assessed and there could be more repeat participants.[18-22]  
47  
48  
49  
50

### 51 Conclusion

52  
53  
54  
55 The knowledge and awareness of the BokSmart *Safe Six* of both players and coaches  
56 increased in 2015 and 2016 (compared to 2014) since the launch of the programme, however,  
57 did slightly decrease during the post-marketing period. The coaches reported receiving their  
58  
59  
60

1  
2  
3 information regarding the *Safe Six* from the Unions/SARU and social media/news. The  
4 information for the players, came from the coaches and social media/news. Reported usage of  
5 the programme increased in 2015 (i.e. the marketing period), but decreased to the pre-  
6 marketing levels in 2016. Finally the reasons for using the programme were predominantly  
7 for the warm-up, injury prevention and for performance improvements. The information  
8 gathered in this study will help with designing targeted marketing for future programmes and  
9 for further promotion of the BokSmart *Safe Six*. It also provides insight into the perceptions  
10 of the coaches and players regarding the *Safe Six* and therefore allows for BokSmart to make  
11 adjustments accordingly.  
12  
13  
14  
15  
16  
17  
18  
19  
20  
21  
22  
23  
24  
25  
26  
27  
28  
29  
30  
31  
32  
33  
34  
35  
36  
37  
38  
39  
40  
41  
42  
43  
44  
45  
46  
47  
48  
49  
50  
51  
52  
53  
54  
55  
56  
57  
58  
59  
60

## References

1. Brooks J, Kemp S. Recent trends in rugby union injuries. *Clinical Sports Medicine*, 2008:51-73.
2. Hootman JM, Dick R, Agel J. Epidemiology of Collegiate Injuries for 15 Sports: Summary and Recommendations for Injury Prevention Initiatives. *J Athl Train* 2007;42(2):311-19
3. Williams S, Trewartha G, Kemp S, Stokes K. A meta-analysis of injuries in senior men's professional Rugby Union. *Sports Med*. 2013;43(10):1043-55
4. Union AR. Key points for the tackler and ball-carrier, Australian Rugby Union SmartRugby: Confidence in contact. A guide to the SmartRugby Program., 2008:18-19.
5. Union NZR. Technique: the key factors in the tackle and taking the ball into contact. RugbySmart 2007: A guide to injury prevention for peak performance., 2007:12-14.
6. Rugby S. BokSmart: safe and effective techniques in rugby - practical guidelines., 2009.
7. Viljoen W, Patricios J. BokSmart – implementing a National Rugby Safety Programme. *Br J Sports Med*. 2012;46(10):692-93.
8. Gianotti SM, Quarrie KL, Hume PA. Evaluation of RugbySmart: A rugby union community injury prevention programme. *J Sci Med Sport*. 2009;12(3):371-75.
9. Quarrie KL, Gianotti SM, Hopkins WG, Hume PA. Effect of nationwide injury prevention programme on serious spinal injuries in New Zealand rugby union: ecological study. *BMJ* 2007;334(7604):1150.
10. Brown JC, Gardner-Lubbe S, Lambert MI, Van Mechelen W, Verhagen E. The BokSmart intervention programme is associated with improvements in injury prevention behaviours of rugby union players: an ecological cross-sectional study. *Inj Prev*. 2015;21(3):173-78.
11. Brown JC, Gardner-Lubbe S, Lambert MI, van Mechelen W, Verhagen E. Coach-directed education is associated with injury-prevention behaviour in players: an ecological cross-sectional study. *Br J Sports Med*. 2016.
12. Brown JC, Verhagen E, Knol D, Van Mechelen W, Lambert MI. The effectiveness of the nationwide BokSmart rugby injury prevention program on catastrophic injury rates. *Scand J Med Sci Sports*. 2016;26(2):221-25.
13. Sewry N, Verhagen E, Lambert M, van Mechelen W, Brown J. Evaluation of the Effectiveness and Implementation of the BokSmart Safe Six Injury Prevention Programme: a study protocol. *Inj Prev*. 2016:injuryprev-2016
14. Finch CF, Twomey DM, Fortington LV, et al. Preventing Australian football injuries with a targeted neuromuscular control exercise programme: comparative injury rates from a training intervention delivered in a clustered randomised controlled trial. *Inj Prev*. 2015:injuryprev-2015.
15. Hislop M, Stokes K, Williams S, et al. The efficacy of a movement control exercise programme to prevent injuries in youth rugby: a cluster-randomised controlled trial. *Br J Sports Med*. 2017;51(4):330-31.
16. van Mechelen DM, van Mechelen W, Verhagen EALM. Sports injury prevention in your pocket?! Prevention apps assessed against the available scientific evidence: a review. *Br J Sports Med*. 2014;48(11):878-82.
17. Vriend I, Coehoorn I, Verhagen E. Implementation of an App-based neuromuscular training programme to prevent ankle sprains: a process evaluation using the RE-AIM Framework. *Br J Sports Med*. 2015;49(7):484-88.
18. Brown J, Verhagen E, Viljoen W, et al. The incidence and severity of injuries at the 2011 South African Rugby Union (SARU) Youth Week tournaments. *South Afr J Sports Med*. 2012:49-54.

- 1  
2  
3 19. Burger N, Lambert MI, Viljoen W, et al. Mechanisms and factors associated with tackle-  
4 related injuries in South African Youth Rugby Union players. *Am J Sports Med.*  
5 2017;45(2):278-85  
6  
7 20. Burger N, Lambert MI, Viljoen W, Brown JC, Readhead C, Hendricks S. Tackle-related  
8 injury rates and nature of injuries in South African Youth Week tournament rugby union  
9 players (under-13 to under-18): an observational cohort study. *BMJ Open.* 2014;4(8)  
10  
11 21. Burger N, Lambert MI, Viljoen W, Brown JC, Readhead C, Hendricks S. Tackle  
12 technique and tackle-related injuries in high-level South African Rugby Union under-18  
13 players: real-match video analysis. *Br J Sports Med.* 2016;50(15):932-38  
14  
15 22. Mc Fie S, Brown J, Hendricks S, et al. Incidence and Factors Associated With  
16 Concussion Injuries at the 2011 to 2014 South African Rugby Union Youth Week  
17 Tournaments. *Clin. J. Sport Med.* 2016;26(5):398-404.  
18  
19  
20  
21  
22  
23  
24  
25  
26  
27  
28  
29  
30  
31  
32  
33  
34  
35  
36  
37  
38  
39  
40  
41  
42  
43  
44  
45  
46  
47  
48  
49  
50  
51  
52  
53  
54  
55  
56  
57  
58  
59  
60

Contributors:

NS was granted access to the data and was involved in conceptualising the manuscript; she also conducted statistical analyses and wrote the initial drafts of the manuscript. JB and EV were also involved in the statistical analyses. All authors (EV, ML, WvM and JB) were involved in conceptualising and editing drafts of the paper, in the order that they appear on the author list.

*Figure 1a): Players' responses to the question "How did you come to hear about the BokSmart Safe Six?" (participants could choose multiple options). b) Coaches' responses to the question "How did you come to hear about the BokSmart Safe Six?" (participants could choose multiple options).*

*Figure 2a): Players' who claimed to use the exercises, these are their responses to the question "Why did you use the BokSmart Safe Six exercises?" (participants could tick multiple options). b) Coaches' who claimed to use the exercises, these are their responses to the question "Why did you use the BokSmart Safe Six exercises?" (participants could tick multiple options).*

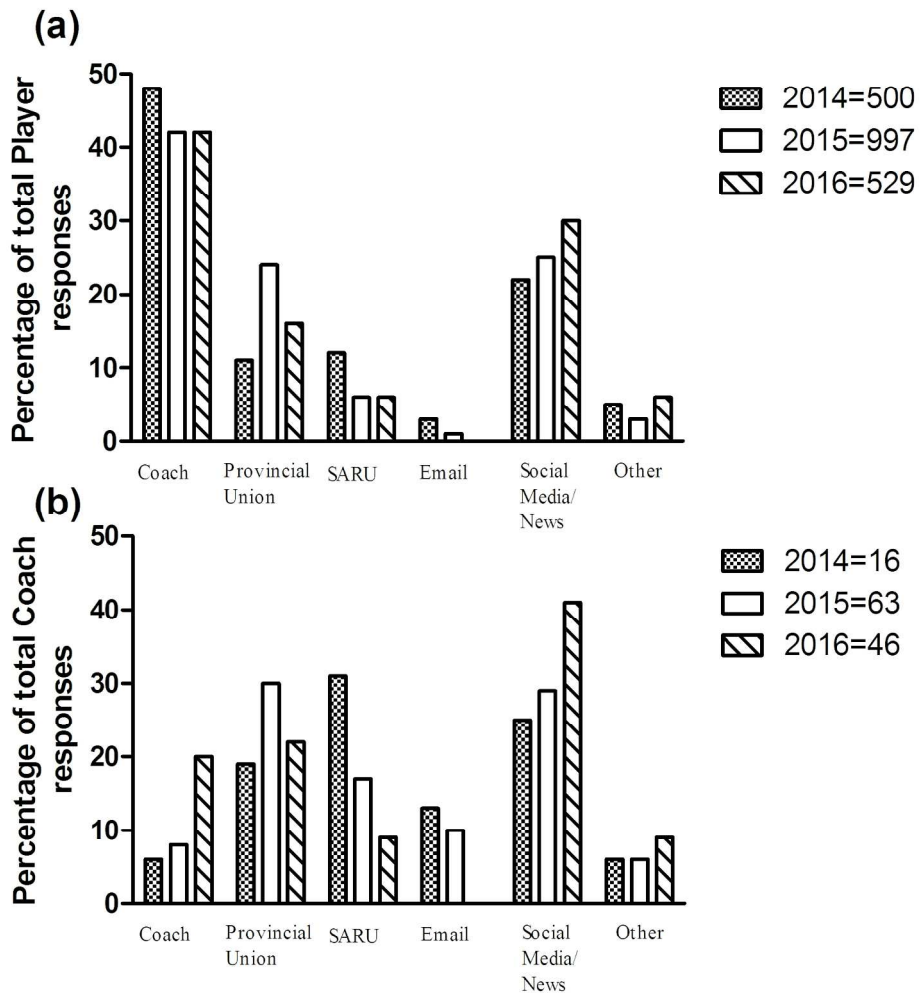

Figure 1a): Players' responses to the question "How did you come to hear about the BokSmart Safe Six?" (participants could choose multiple options). b) Coaches' responses to the question "How did you come to hear about the BokSmart Safe Six?" (participants could choose multiple options).

184x194mm (300 x 300 DPI)

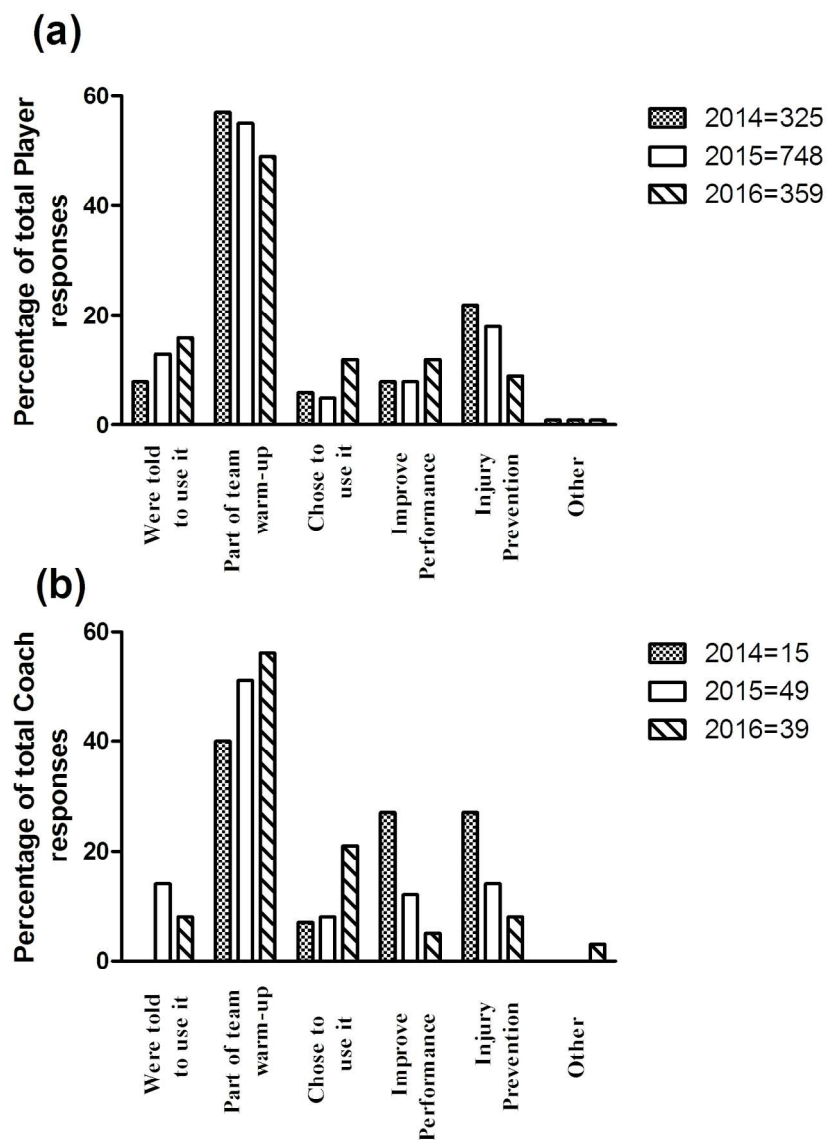

Figure 2a): Players' who claimed to use the exercises, these are their responses to the question "Why did you use the BokSmart Safe Six exercises?" (participants could tick multiple options). b) Coaches' who claimed to use the exercises, these are their responses to the question "Why did you use the BokSmart Safe Six exercises?" (participants could tick multiple options).

154x205mm (300 x 300 DPI)

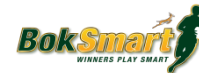

1 **SARU MEDICAL DEPARTMENT SURVEY 2016**

2 **SARU YOUTH WEEK TOURNAMENTS**

3  
4 U13 U16 LSEN U18 Academy Week U18 Craven Week

Team:

Province:

5 **BokSmart Safe Six Questionnaire**

6 *Please tick the box or circle the number that best matches your answer. Where required also provide a very brief and to the point comment*  
7 *in the space provided! This questionnaire needs to be completed by ALL SARU Youth week players and team coaches.*

9 Please indicate your current role by ticking or circling the correct box i.e. whether you are the team coach, manager or a player

10  
11  Team Coach  Team Manager  Player (  Forward  Backline )

13 **Questions**

14 1. Have you ever heard of the 'BokSmart Safe Six'? YES  NO

16 *If you answered YES to Question 1, then please continue with Question 2*

17 *If you answered NO to Question 1, then go to Question 9*

19 2. How did you come to hear about the 'BokSmart Safe Six'? (tick all boxes that are applicable)

20  
21  Twitter  Website  Facebook  Coach  Provincial Union  News article  Poster  Email  SARU  Other (specify below)

22  
23  
24  
25

26  
27 3. Can you name any of the 'BokSmart Safe Six' exercises? YES  NO

28  
29 *If you answered YES to Question 3, then please list as many of these as you can remember in the space provided below*

30

|       |       |       |
|-------|-------|-------|
| 31 1. | 3. 3. | 5. 5. |
| 32 2. | 4. 4. | 6. 6. |

33  
34 4. In the last 6-8 weeks, have you ever used the 'BokSmart Safe Six' exercises? YES  NO

35  
36 *If you answered YES to Question 4, then please continue with Question 5 below.*

37 *If you answered NO to Question 4, then please go to Question 8.*

38  
39 5. Why did you use the 'BokSmart Safe Six' exercises? (tick all boxes that are applicable)

40  
41  Were told to use it  Part of team warm-up  Chose to use it  Improve performance  Injury prevention  Other (specify below)

42  
43  
44  
45  
46  
47

48 6. For how many weeks and on average, how many times per week did you use the 'BokSmart Safe Six' exercises?

49 **NUMBER OF WEEKS**

50  1  2  3  4  5  6  7  8 or more weeks

49 **AVERAGE DAYS PER WEEK**

50  1  2  3  4  5  6  7

51  
52  
53 7. Did you find the 'BokSmart Safe Six' exercises easy to perform? YES  NO

54  
55 8. Why did you NOT use the 'BokSmart Safe Six' exercises?

56  
57  
58  
59

60 9. Would you be interested in knowing more about the 'BokSmart Safe Six'? YES  NO

For peer review only - <http://bmjopen.bmj.com/site/about/guidelines.xhtml>



STROBE Statement—Checklist of items that should be included in reports of *cross-sectional studies*

| Pg Number |                              | Item No | Recommendation                                                                                                                                                                                                                                                                                                                             |
|-----------|------------------------------|---------|--------------------------------------------------------------------------------------------------------------------------------------------------------------------------------------------------------------------------------------------------------------------------------------------------------------------------------------------|
| 1         | <b>Title and abstract</b>    | 1       | (a) Indicate the study's design with a commonly used term in the title or the abstract                                                                                                                                                                                                                                                     |
| 3         |                              |         | (b) Provide in the abstract an informative and balanced summary of what was done and what was found                                                                                                                                                                                                                                        |
|           | <b>Introduction</b>          |         |                                                                                                                                                                                                                                                                                                                                            |
| 5         | Background/rationale         | 2       | Explain the scientific background and rationale for the investigation being reported                                                                                                                                                                                                                                                       |
| 5         | Objectives                   | 3       | State specific objectives, including any prespecified hypotheses                                                                                                                                                                                                                                                                           |
|           | <b>Methods</b>               |         |                                                                                                                                                                                                                                                                                                                                            |
| 5-6       | Study design                 | 4       | Present key elements of study design early in the paper                                                                                                                                                                                                                                                                                    |
| 5-6       | Setting                      | 5       | Describe the setting, locations, and relevant dates, including periods of recruitment, exposure, follow-up, and data collection                                                                                                                                                                                                            |
| 5-6       | Participants                 | 6       | (a) Give the eligibility criteria, and the sources and methods of selection of participants                                                                                                                                                                                                                                                |
| 6         | Variables                    | 7       | Clearly define all outcomes, exposures, predictors, potential confounders, and effect modifiers. Give diagnostic criteria, if applicable                                                                                                                                                                                                   |
| 6         | Data sources/<br>measurement | 8*      | For each variable of interest, give sources of data and details of methods of assessment (measurement). Describe comparability of assessment methods if there is more than one group                                                                                                                                                       |
|           | Bias                         | 9       | Describe any efforts to address potential sources of bias                                                                                                                                                                                                                                                                                  |
| 5         | Study size                   | 10      | Explain how the study size was arrived at                                                                                                                                                                                                                                                                                                  |
|           | Quantitative variables       | 11      | Explain how quantitative variables were handled in the analyses. If applicable, describe which groupings were chosen and why                                                                                                                                                                                                               |
| 6         | Statistical methods          | 12      | (a) Describe all statistical methods, including those used to control for confounding<br>(b) Describe any methods used to examine subgroups and interactions<br>(c) Explain how missing data were addressed<br>(d) If applicable, describe analytical methods taking account of sampling strategy<br>(e) Describe any sensitivity analyses |
|           | <b>Results</b>               |         |                                                                                                                                                                                                                                                                                                                                            |
| 7         | Participants                 | 13*     | (a) Report numbers of individuals at each stage of study—eg numbers potentially eligible, examined for eligibility, confirmed eligible, included in the study, completing follow-up, and analysed<br>(b) Give reasons for non-participation at each stage<br>(c) Consider use of a flow diagram                                            |
| 7         | Descriptive data             | 14*     | (a) Give characteristics of study participants (eg demographic, clinical, social) and information on exposures and potential confounders<br>(b) Indicate number of participants with missing data for each variable of interest                                                                                                            |
| 7-8       | Outcome data                 | 15*     | Report numbers of outcome events or summary measures                                                                                                                                                                                                                                                                                       |
| 7-8       | Main results                 | 16      | (a) Give unadjusted estimates and, if applicable, confounder-adjusted estimates and their precision (eg, 95% confidence interval). Make clear which confounders were adjusted for and why they were included                                                                                                                               |

1  
2  
3  
4  
5  
6  
7  
8  
9  
10  
11  
12  
13  
14  
15  
16  
17  
18  
19  
20  
21  
22  
23  
24  
25  
26  
27  
28  
29  
30  
31  
32  
33  
34  
35  
36  
37  
38  
39  
40  
41  
42  
43  
44  
45  
46  
47  
48  
49  
50  
51  
52  
53  
54  
55  
56  
57  
58  
59  
60

(b) Report category boundaries when continuous variables were categorized

(c) If relevant, consider translating estimates of relative risk into absolute risk for a meaningful time period

|                          |                  |    |                                                                                                                                                                            |
|--------------------------|------------------|----|----------------------------------------------------------------------------------------------------------------------------------------------------------------------------|
|                          | Other analyses   | 17 | Report other analyses done—eg analyses of subgroups and interactions, and sensitivity analyses                                                                             |
| <b>Discussion</b>        |                  |    |                                                                                                                                                                            |
| 9-10                     | Key results      | 18 | Summarise key results with reference to study objectives                                                                                                                   |
| 10                       | Limitations      | 19 | Discuss limitations of the study, taking into account sources of potential bias or imprecision. Discuss both direction and magnitude of any potential bias                 |
| 9-10                     | Interpretation   | 20 | Give a cautious overall interpretation of results considering objectives, limitations, multiplicity of analyses, results from similar studies, and other relevant evidence |
| 9-10                     | Generalisability | 21 | Discuss the generalisability (external validity) of the study results                                                                                                      |
| <b>Other information</b> |                  |    |                                                                                                                                                                            |
| 2                        | Funding          | 22 | Give the source of funding and the role of the funders for the present study and, if applicable, for the original study on which the present article is based              |

\*Give information separately for exposed and unexposed groups.

**Note:** An Explanation and Elaboration article discusses each checklist item and gives methodological background and published examples of transparent reporting. The STROBE checklist is best used in conjunction with this article (freely available on the Web sites of PLoS Medicine at <http://www.plosmedicine.org/>, Annals of Internal Medicine at <http://www.annals.org/>, and Epidemiology at <http://www.epidem.com/>). Information on the STROBE Initiative is available at [www.strobe-statement.org](http://www.strobe-statement.org).
